# Supplementary material for: Causal Effects of Lifetime Smoking on Breast and Colorectal Cancer Risk: Mendelian Randomization Study
Source: Oxford University Press journal article supplement (doi:10.1158/1055-9965.epi-20-1218), 2021-03-02
Supplement: 10559965epi201218-sup-249540_3_supp_6914560_qxdkyg.doc [file 10559965epi201218-sup-249540_3_supp_6914560_qxdkyg.doc]

| Supplementary Table 1. Number of cancer cases and controls in the Mendelian randomization study of smoking and risk of breast and colorectal cancer. | | | |
| --- | --- | --- | --- |
| Cancer type | Cases | Controls | Total |
|
| Breast cancer | | | |
| Overall | 122,977 | 105,974 | 228,951 |
| ER+ subset | 69,501 | 95,042 | 164,543 |
| ER- subset | 21,468 | 100,594 | 122,062 |
| Colorectal cancer | | | |
| Overall | 52,775 | 45,940 | 98,715 |
| Overall (women) | 24,568 | 23,736 | 48,304 |
| Overall (men) | 28,207 | 22,204 | 50,411 |
| Colon | 27,817 | 46,287 | 74,104 |
| Rectal | 13,713 | 46,287 | 60,000 |
| Distal colon | 14,016 | 46,287 | 60,303 |
| Proximal colon | 12,360 | 46,287 | 58,647 |

ER: estrogen receptor
