# Supplementary material for: Causal Effects of Lifetime Smoking on Breast and Colorectal Cancer Risk: Mendelian Randomization Study
Source: Oxford University Press journal article supplement (doi:10.1158/1055-9965.epi-20-1218), 2021-03-02
Supplement: 10559965epi201218-sup-249540_3_supp_6914584_qndkyh.doc [file 10559965epi201218-sup-249540_3_supp_6914584_qndkyh.doc]

| Supplementary Table 4. Mendelian randomization estimates for the causal effect of lifetime amount of smoking/ ever having smoked regularly on lung cancer risk. | | | |
| --- | --- | --- | --- |
| Methods | OR | 95% CI | P-value |
| Lifetime amount of smokinga | | | |
| IVW | 4.21 | (2.98-5.96) | 3.49Ε-16 |
| MR-Egger | 16.64 | (3.88-71.42) | 9.61Ε-05 |
| Weighted median | 2.77 | (1.91-4.03) | 8.88Ε-08 |
| Ever smoking regularly | | | |
| IVW | 1.90 | (1.56-2.31) | 1.65E-10 |
| MR-Egger | 2.84 | (1.33-6.05) | 7.43E-03 |
| Weighted median | 2.07 | (1.57-2.73) | 2.25E-07 |
| OR: odds ratio; CI: confidence intervals; IVW: Inverse-variance weighted | | | |
| a Estimates obtained from Wootton et al. https://doi.org/10.1017/S0033291719002678 | | | |
