# Supplementary material for: Causal Effects of Lifetime Smoking on Breast and Colorectal Cancer Risk: Mendelian Randomization Study
Source: Oxford University Press journal article supplement (doi:10.1158/1055-9965.epi-20-1218), 2021-03-02
Supplement: 10559965epi201218-sup-249540_3_supp_6914597_q6dkyh.doc [file 10559965epi201218-sup-249540_3_supp_6914597_q6dkyh.doc]

| Supplementary Table 6. Mendelian randomization estimates for the causal effect of (A) lifetime amount of smoking, and (B) ever having smoked regularly on colorectal cancer risk, a sensitivity analysis leaving one SNP out at a time. | | | | | | | | | | | | | | | | | | |  |  |  |
| --- | --- | --- | --- | --- | --- | --- | --- | --- | --- | --- | --- | --- | --- | --- | --- | --- | --- | --- | --- | --- | --- |
|  | Colorectal Cancer | | | Colorectal Cancer (women) | | | Colorectal Cancer (men) | | | Colon Cancer | | | Distal Colon Cancer | | | Proximal Colon Cancer | | | Rectal Cancer | | |
| SNP (left out) | OR | 95% CI | P-value | OR | 95% CI | P-value | OR | 95% CI | P-value | OR | 95% CI | P- value | OR | 95% CI | P- value | OR | 95% CI | P- value | OR | 95% CI | P-value |
| (A) Lifetime amount of smoking | | | | | | | | | | | | | | | | | | | | | |
| rs1193237 | 1.21 | (1.05-1.41) | 1.03E-02 | 1.11 | (0.9-1.38) | 3.21E-01 | 1.32 | (1.11-1.59) | 2.31E-03 | 1.32 | (1.11-1.56) | 1.24E-03 | 1.51 | (1.21-1.89) | 2.29E-04 | 1.20 | (0.98-1.46) | 7.94E-02 | 1.37 | (1.08-1.74) | 1.00E-02 |
| rs4949465 | 1.22 | (1.05-1.41) | 8.58E-03 | 1.10 | (0.89-1.37) | 3.60E-01 | 1.35 | (1.13-1.62) | 1.16E-03 | 1.32 | (1.12-1.56) | 9.78E-04 | 1.52 | (1.22-1.89) | 1.86E-04 | 1.20 | (0.98-1.47) | 7.55E-02 | 1.38 | (1.08-1.75) | 8.86E-03 |
| rs549845 | 1.21 | (1.04-1.4) | 1.38E-02 | 1.11 | (0.89-1.37) | 3.49E-01 | 1.32 | (1.1-1.58) | 2.87E-03 | 1.31 | (1.11-1.55) | 1.64E-03 | 1.50 | (1.2-1.87) | 3.56E-04 | 1.20 | (0.98-1.47) | 8.10E-02 | 1.35 | (1.06-1.72) | 1.51E-02 |
| rs1933270 | 1.21 | (1.04-1.4) | 1.29E-02 | 1.11 | (0.9-1.37) | 3.39E-01 | 1.32 | (1.1-1.58) | 2.93E-03 | 1.31 | (1.11-1.55) | 1.72E-03 | 1.50 | (1.21-1.88) | 2.94E-04 | 1.19 | (0.97-1.45) | 9.31E-02 | 1.35 | (1.06-1.72) | 1.39E-02 |
| rs7528604 | 1.23 | (1.06-1.42) | 6.21E-03 | 1.13 | (0.91-1.39) | 2.72E-01 | 1.34 | (1.12-1.61) | 1.52E-03 | 1.32 | (1.12-1.56) | 1.11E-03 | 1.52 | (1.22-1.89) | 2.08E-04 | 1.20 | (0.98-1.47) | 7.06E-02 | 1.38 | (1.09-1.75) | 8.59E-03 |
| rs11210229 | 1.22 | (1.05-1.42) | 8.42E-03 | 1.12 | (0.9-1.39) | 3.01E-01 | 1.33 | (1.11-1.6) | 1.93E-03 | 1.33 | (1.12-1.57) | 8.21E-04 | 1.54 | (1.24-1.92) | 1.11E-04 | 1.20 | (0.98-1.47) | 7.69E-02 | 1.34 | (1.05-1.71) | 1.71E-02 |
| rs7553348 | 1.21 | (1.04-1.41) | 1.12E-02 | 1.12 | (0.9-1.38) | 3.10E-01 | 1.32 | (1.1-1.58) | 2.73E-03 | 1.30 | (1.1-1.54) | 1.90E-03 | 1.49 | (1.2-1.86) | 3.87E-04 | 1.19 | (0.97-1.45) | 9.61E-02 | 1.36 | (1.07-1.73) | 1.33E-02 |
| rs10922907 | 1.21 | (1.04-1.4) | 1.22E-02 | 1.12 | (0.91-1.39) | 2.92E-01 | 1.31 | (1.09-1.57) | 3.45E-03 | 1.31 | (1.11-1.55) | 1.62E-03 | 1.49 | (1.2-1.86) | 3.85E-04 | 1.20 | (0.98-1.47) | 7.90E-02 | 1.38 | (1.09-1.76) | 7.87E-03 |
| rs1931263 | 1.22 | (1.06-1.42) | 7.12E-03 | 1.12 | (0.91-1.39) | 2.75E-01 | 1.33 | (1.11-1.59) | 1.96E-03 | 1.33 | (1.13-1.57) | 6.77E-04 | 1.52 | (1.23-1.9) | 1.57E-04 | 1.21 | (0.99-1.48) | 6.09E-02 | 1.37 | (1.07-1.74) | 1.11E-02 |
| rs7519626 | 1.21 | (1.04-1.4) | 1.16E-02 | 1.10 | (0.89-1.37) | 3.62E-01 | 1.33 | (1.11-1.59) | 1.94E-03 | 1.31 | (1.11-1.55) | 1.67E-03 | 1.51 | (1.21-1.88) | 2.61E-04 | 1.19 | (0.97-1.46) | 9.07E-02 | 1.35 | (1.06-1.72) | 1.37E-02 |
| rs9435340 | 1.20 | (1.03-1.39) | 1.57E-02 | 1.10 | (0.89-1.36) | 3.72E-01 | 1.30 | (1.09-1.56) | 4.09E-03 | 1.30 | (1.1-1.54) | 1.80E-03 | 1.49 | (1.19-1.85) | 3.89E-04 | 1.19 | (0.98-1.46) | 8.36E-02 | 1.34 | (1.06-1.7) | 1.63E-02 |
| rs10918701 | 1.21 | (1.04-1.4) | 1.28E-02 | 1.10 | (0.89-1.36) | 3.96E-01 | 1.33 | (1.11-1.59) | 1.98E-03 | 1.30 | (1.1-1.54) | 1.91E-03 | 1.48 | (1.19-1.84) | 4.22E-04 | 1.19 | (0.97-1.46) | 9.09E-02 | 1.34 | (1.06-1.71) | 1.57E-02 |
| rs2867112 | 1.21 | (1.04-1.4) | 1.37E-02 | 1.11 | (0.9-1.38) | 3.35E-01 | 1.31 | (1.09-1.57) | 3.60E-03 | 1.30 | (1.1-1.54) | 2.07E-03 | 1.50 | (1.2-1.87) | 3.69E-04 | 1.19 | (0.97-1.45) | 9.89E-02 | 1.35 | (1.06-1.72) | 1.50E-02 |
| rs6741228 | 1.21 | (1.04-1.4) | 1.15E-02 | 1.11 | (0.9-1.38) | 3.28E-01 | 1.32 | (1.1-1.58) | 2.50E-03 | 1.31 | (1.11-1.55) | 1.57E-03 | 1.52 | (1.22-1.89) | 2.16E-04 | 1.18 | (0.97-1.45) | 1.02E-01 | 1.36 | (1.07-1.73) | 1.31E-02 |
| rs62135536 | 1.21 | (1.04-1.4) | 1.18E-02 | 1.10 | (0.89-1.36) | 3.82E-01 | 1.33 | (1.11-1.6) | 1.85E-03 | 1.31 | (1.11-1.55) | 1.60E-03 | 1.50 | (1.21-1.88) | 2.95E-04 | 1.20 | (0.98-1.46) | 8.06E-02 | 1.37 | (1.08-1.74) | 1.02E-02 |
| rs7569203 | 1.23 | (1.06-1.42) | 6.73E-03 | 1.12 | (0.91-1.39) | 2.88E-01 | 1.34 | (1.12-1.6) | 1.62E-03 | 1.32 | (1.12-1.56) | 1.17E-03 | 1.53 | (1.22-1.9) | 1.65E-04 | 1.19 | (0.97-1.45) | 9.46E-02 | 1.39 | (1.1-1.76) | 6.70E-03 |
| rs13016665 | 1.21 | (1.04-1.4) | 1.33E-02 | 1.12 | (0.9-1.38) | 3.07E-01 | 1.30 | (1.09-1.56) | 3.95E-03 | 1.30 | (1.1-1.54) | 1.85E-03 | 1.49 | (1.2-1.86) | 3.75E-04 | 1.19 | (0.97-1.46) | 8.88E-02 | 1.34 | (1.06-1.71) | 1.58E-02 |
| rs4671357 | 1.20 | (1.04-1.4) | 1.39E-02 | 1.10 | (0.89-1.36) | 3.94E-01 | 1.33 | (1.11-1.59) | 2.27E-03 | 1.30 | (1.1-1.54) | 1.85E-03 | 1.50 | (1.2-1.87) | 3.32E-04 | 1.19 | (0.97-1.45) | 9.80E-02 | 1.35 | (1.06-1.72) | 1.42E-02 |
| rs359243 | 1.21 | (1.05-1.41) | 1.04E-02 | 1.11 | (0.9-1.38) | 3.21E-01 | 1.32 | (1.1-1.59) | 2.35E-03 | 1.31 | (1.11-1.55) | 1.63E-03 | 1.49 | (1.19-1.85) | 4.14E-04 | 1.20 | (0.98-1.47) | 7.07E-02 | 1.37 | (1.08-1.74) | 9.87E-03 |
| rs2678670 | 1.21 | (1.04-1.4) | 1.21E-02 | 1.11 | (0.9-1.38) | 3.29E-01 | 1.32 | (1.1-1.58) | 2.71E-03 | 1.30 | (1.1-1.54) | 1.85E-03 | 1.50 | (1.2-1.87) | 3.20E-04 | 1.18 | (0.97-1.45) | 1.01E-01 | 1.36 | (1.07-1.73) | 1.32E-02 |
| rs62155874 | 1.21 | (1.04-1.4) | 1.36E-02 | 1.11 | (0.89-1.37) | 3.48E-01 | 1.32 | (1.1-1.58) | 2.83E-03 | 1.31 | (1.11-1.55) | 1.55E-03 | 1.49 | (1.2-1.86) | 3.77E-04 | 1.20 | (0.98-1.47) | 7.01E-02 | 1.36 | (1.07-1.73) | 1.27E-02 |
| rs3811038 | 1.20 | (1.04-1.4) | 1.38E-02 | 1.10 | (0.89-1.36) | 3.85E-01 | 1.32 | (1.1-1.58) | 2.51E-03 | 1.31 | (1.11-1.55) | 1.61E-03 | 1.51 | (1.21-1.88) | 2.50E-04 | 1.18 | (0.97-1.45) | 9.99E-02 | 1.33 | (1.05-1.68) | 1.91E-02 |
| rs2890772 | 1.23 | (1.06-1.42) | 6.61E-03 | 1.12 | (0.9-1.39) | 3.00E-01 | 1.35 | (1.12-1.62) | 1.25E-03 | 1.34 | (1.14-1.58) | 5.13E-04 | 1.54 | (1.24-1.92) | 1.21E-04 | 1.22 | (1-1.49) | 5.22E-02 | 1.37 | (1.07-1.74) | 1.13E-02 |
| rs62175972 | 1.19 | (1.03-1.37) | 1.74E-02 | 1.08 | (0.88-1.32) | 4.70E-01 | 1.32 | (1.1-1.58) | 2.73E-03 | 1.29 | (1.1-1.52) | 2.30E-03 | 1.48 | (1.19-1.84) | 4.28E-04 | 1.18 | (0.97-1.44) | 1.06E-01 | 1.33 | (1.05-1.69) | 1.78E-02 |
| rs3769949 | 1.21 | (1.04-1.41) | 1.11E-02 | 1.11 | (0.9-1.37) | 3.45E-01 | 1.33 | (1.11-1.59) | 2.14E-03 | 1.31 | (1.11-1.55) | 1.56E-03 | 1.49 | (1.2-1.86) | 3.59E-04 | 1.20 | (0.98-1.47) | 7.57E-02 | 1.36 | (1.07-1.73) | 1.26E-02 |
| rs13009008 | 1.21 | (1.04-1.4) | 1.36E-02 | 1.11 | (0.89-1.37) | 3.53E-01 | 1.31 | (1.09-1.57) | 3.40E-03 | 1.30 | (1.1-1.54) | 1.93E-03 | 1.52 | (1.22-1.89) | 1.76E-04 | 1.17 | (0.96-1.42) | 1.19E-01 | 1.35 | (1.06-1.72) | 1.41E-02 |
| rs4473348 | 1.20 | (1.04-1.39) | 1.55E-02 | 1.09 | (0.88-1.34) | 4.31E-01 | 1.33 | (1.11-1.59) | 2.22E-03 | 1.29 | (1.09-1.52) | 2.49E-03 | 1.49 | (1.2-1.86) | 3.65E-04 | 1.17 | (0.96-1.42) | 1.26E-01 | 1.37 | (1.07-1.74) | 1.09E-02 |
| rs12623702 | 1.23 | (1.07-1.43) | 4.46E-03 | 1.13 | (0.92-1.4) | 2.52E-01 | 1.35 | (1.12-1.61) | 1.31E-03 | 1.34 | (1.14-1.57) | 4.59E-04 | 1.53 | (1.23-1.91) | 1.23E-04 | 1.22 | (1-1.49) | 4.66E-02 | 1.37 | (1.08-1.75) | 9.45E-03 |
| rs6779302 | 1.21 | (1.04-1.41) | 1.16E-02 | 1.11 | (0.9-1.38) | 3.33E-01 | 1.33 | (1.11-1.59) | 2.23E-03 | 1.31 | (1.11-1.55) | 1.66E-03 | 1.49 | (1.2-1.86) | 3.60E-04 | 1.20 | (0.98-1.47) | 7.87E-02 | 1.34 | (1.05-1.7) | 1.67E-02 |
| rs6778080 | 1.21 | (1.04-1.4) | 1.18E-02 | 1.11 | (0.9-1.37) | 3.43E-01 | 1.32 | (1.11-1.59) | 2.34E-03 | 1.31 | (1.11-1.55) | 1.63E-03 | 1.51 | (1.21-1.88) | 2.85E-04 | 1.19 | (0.97-1.46) | 8.87E-02 | 1.36 | (1.07-1.73) | 1.23E-02 |
| rs775758 | 1.22 | (1.05-1.41) | 8.53E-03 | 1.11 | (0.9-1.38) | 3.25E-01 | 1.34 | (1.12-1.6) | 1.62E-03 | 1.32 | (1.12-1.56) | 1.09E-03 | 1.51 | (1.22-1.89) | 2.22E-04 | 1.20 | (0.98-1.47) | 7.83E-02 | 1.36 | (1.07-1.73) | 1.28E-02 |
| rs421983 | 1.22 | (1.05-1.41) | 8.35E-03 | 1.11 | (0.9-1.38) | 3.28E-01 | 1.34 | (1.12-1.61) | 1.46E-03 | 1.33 | (1.13-1.57) | 6.67E-04 | 1.53 | (1.23-1.91) | 1.27E-04 | 1.21 | (0.99-1.47) | 6.74E-02 | 1.37 | (1.08-1.75) | 9.34E-03 |
| rs326341 | 1.21 | (1.04-1.4) | 1.19E-02 | 1.11 | (0.89-1.37) | 3.45E-01 | 1.32 | (1.1-1.59) | 2.37E-03 | 1.31 | (1.11-1.55) | 1.65E-03 | 1.51 | (1.21-1.88) | 2.63E-04 | 1.19 | (0.97-1.45) | 9.57E-02 | 1.35 | (1.06-1.72) | 1.45E-02 |
| rs73220544 | 1.21 | (1.04-1.4) | 1.27E-02 | 1.11 | (0.9-1.38) | 3.27E-01 | 1.31 | (1.1-1.57) | 3.14E-03 | 1.31 | (1.11-1.55) | 1.60E-03 | 1.51 | (1.21-1.88) | 2.67E-04 | 1.19 | (0.97-1.46) | 9.11E-02 | 1.35 | (1.06-1.72) | 1.41E-02 |
| rs9842947 | 1.21 | (1.05-1.41) | 1.04E-02 | 1.12 | (0.91-1.39) | 2.95E-01 | 1.32 | (1.1-1.58) | 2.75E-03 | 1.31 | (1.11-1.55) | 1.44E-03 | 1.51 | (1.21-1.89) | 2.34E-04 | 1.19 | (0.98-1.46) | 8.56E-02 | 1.36 | (1.07-1.73) | 1.21E-02 |
| rs624833 | 1.21 | (1.04-1.41) | 1.11E-02 | 1.12 | (0.9-1.38) | 3.07E-01 | 1.32 | (1.1-1.58) | 2.74E-03 | 1.31 | (1.11-1.55) | 1.41E-03 | 1.52 | (1.22-1.89) | 1.88E-04 | 1.19 | (0.97-1.45) | 9.56E-02 | 1.35 | (1.06-1.71) | 1.50E-02 |
| rs61796681 | 1.21 | (1.04-1.4) | 1.24E-02 | 1.11 | (0.89-1.37) | 3.55E-01 | 1.32 | (1.1-1.58) | 2.46E-03 | 1.31 | (1.11-1.54) | 1.73E-03 | 1.49 | (1.2-1.85) | 3.77E-04 | 1.19 | (0.98-1.46) | 8.36E-02 | 1.36 | (1.07-1.73) | 1.16E-02 |
| rs317021 | 1.21 | (1.04-1.4) | 1.16E-02 | 1.10 | (0.89-1.36) | 3.83E-01 | 1.34 | (1.11-1.6) | 1.71E-03 | 1.31 | (1.11-1.55) | 1.68E-03 | 1.50 | (1.21-1.88) | 3.02E-04 | 1.19 | (0.97-1.45) | 9.57E-02 | 1.36 | (1.07-1.73) | 1.23E-02 |
| rs72678864 | 1.21 | (1.04-1.41) | 1.16E-02 | 1.10 | (0.89-1.37) | 3.67E-01 | 1.33 | (1.11-1.6) | 1.89E-03 | 1.30 | (1.1-1.54) | 1.91E-03 | 1.49 | (1.19-1.86) | 3.95E-04 | 1.20 | (0.98-1.46) | 8.35E-02 | 1.37 | (1.08-1.74) | 1.08E-02 |
| rs17576594 | 1.21 | (1.04-1.4) | 1.34E-02 | 1.10 | (0.89-1.36) | 3.75E-01 | 1.32 | (1.1-1.58) | 2.62E-03 | 1.31 | (1.1-1.54) | 1.78E-03 | 1.51 | (1.21-1.88) | 2.68E-04 | 1.18 | (0.97-1.44) | 1.06E-01 | 1.35 | (1.06-1.72) | 1.41E-02 |
| rs11948770 | 1.21 | (1.04-1.4) | 1.23E-02 | 1.11 | (0.9-1.38) | 3.26E-01 | 1.32 | (1.1-1.58) | 2.93E-03 | 1.30 | (1.1-1.54) | 1.96E-03 | 1.48 | (1.19-1.85) | 4.33E-04 | 1.19 | (0.97-1.45) | 9.82E-02 | 1.35 | (1.06-1.72) | 1.44E-02 |
| rs71627581 | 1.20 | (1.04-1.39) | 1.45E-02 | 1.10 | (0.89-1.36) | 3.70E-01 | 1.31 | (1.09-1.57) | 3.33E-03 | 1.29 | (1.1-1.53) | 2.21E-03 | 1.48 | (1.19-1.83) | 4.24E-04 | 1.18 | (0.97-1.45) | 9.83E-02 | 1.34 | (1.06-1.71) | 1.58E-02 |
| rs10052591 | 1.21 | (1.04-1.4) | 1.22E-02 | 1.12 | (0.9-1.38) | 3.12E-01 | 1.31 | (1.1-1.57) | 3.11E-03 | 1.31 | (1.11-1.55) | 1.47E-03 | 1.50 | (1.2-1.87) | 3.30E-04 | 1.20 | (0.99-1.47) | 6.99E-02 | 1.35 | (1.06-1.71) | 1.55E-02 |
| rs2080870 | 1.21 | (1.04-1.41) | 1.13E-02 | 1.11 | (0.89-1.37) | 3.50E-01 | 1.33 | (1.11-1.59) | 2.05E-03 | 1.31 | (1.11-1.55) | 1.58E-03 | 1.51 | (1.21-1.89) | 2.35E-04 | 1.19 | (0.97-1.45) | 9.52E-02 | 1.36 | (1.07-1.74) | 1.13E-02 |
| rs4571506 | 1.23 | (1.06-1.42) | 5.81E-03 | 1.13 | (0.91-1.39) | 2.71E-01 | 1.34 | (1.12-1.6) | 1.51E-03 | 1.32 | (1.12-1.56) | 8.79E-04 | 1.52 | (1.22-1.9) | 1.60E-04 | 1.20 | (0.99-1.47) | 6.87E-02 | 1.37 | (1.08-1.74) | 1.02E-02 |
| rs4957528 | 1.21 | (1.04-1.41) | 1.14E-02 | 1.11 | (0.9-1.38) | 3.17E-01 | 1.32 | (1.1-1.58) | 2.72E-03 | 1.31 | (1.11-1.55) | 1.65E-03 | 1.49 | (1.2-1.86) | 3.70E-04 | 1.20 | (0.98-1.46) | 8.18E-02 | 1.38 | (1.08-1.75) | 8.73E-03 |
| rs329120 | 1.21 | (1.04-1.4) | 1.23E-02 | 1.11 | (0.89-1.37) | 3.57E-01 | 1.33 | (1.11-1.59) | 2.24E-03 | 1.31 | (1.1-1.54) | 1.78E-03 | 1.51 | (1.21-1.88) | 2.61E-04 | 1.18 | (0.97-1.44) | 1.07E-01 | 1.34 | (1.05-1.71) | 1.67E-02 |
| rs986391 | 1.21 | (1.04-1.4) | 1.37E-02 | 1.11 | (0.89-1.37) | 3.50E-01 | 1.31 | (1.1-1.57) | 3.13E-03 | 1.30 | (1.1-1.53) | 2.20E-03 | 1.49 | (1.19-1.86) | 4.08E-04 | 1.18 | (0.96-1.44) | 1.12E-01 | 1.34 | (1.05-1.7) | 1.78E-02 |
| rs13153393 | 1.21 | (1.04-1.4) | 1.19E-02 | 1.12 | (0.9-1.38) | 3.16E-01 | 1.31 | (1.1-1.57) | 3.12E-03 | 1.32 | (1.11-1.56) | 1.29E-03 | 1.51 | (1.21-1.88) | 2.61E-04 | 1.20 | (0.98-1.47) | 7.62E-02 | 1.37 | (1.08-1.75) | 9.70E-03 |
| rs245774 | 1.21 | (1.05-1.41) | 1.04E-02 | 1.11 | (0.9-1.38) | 3.24E-01 | 1.32 | (1.11-1.59) | 2.28E-03 | 1.31 | (1.11-1.55) | 1.37E-03 | 1.51 | (1.21-1.88) | 2.52E-04 | 1.20 | (0.98-1.46) | 8.19E-02 | 1.36 | (1.07-1.72) | 1.34E-02 |
| rs6935954 | 1.21 | (1.04-1.4) | 1.24E-02 | 1.11 | (0.9-1.38) | 3.22E-01 | 1.32 | (1.1-1.58) | 2.94E-03 | 1.30 | (1.1-1.54) | 1.99E-03 | 1.51 | (1.21-1.88) | 2.78E-04 | 1.18 | (0.96-1.44) | 1.08E-01 | 1.37 | (1.07-1.74) | 1.14E-02 |
| rs2254710 | 1.22 | (1.05-1.41) | 8.53E-03 | 1.12 | (0.91-1.38) | 2.98E-01 | 1.33 | (1.11-1.59) | 1.95E-03 | 1.32 | (1.12-1.56) | 1.18E-03 | 1.52 | (1.22-1.89) | 2.10E-04 | 1.19 | (0.98-1.46) | 8.38E-02 | 1.37 | (1.08-1.74) | 9.44E-03 |
| rs2894808 | 1.21 | (1.05-1.41) | 1.06E-02 | 1.11 | (0.9-1.38) | 3.33E-01 | 1.33 | (1.11-1.59) | 2.12E-03 | 1.32 | (1.11-1.56) | 1.29E-03 | 1.50 | (1.2-1.87) | 3.29E-04 | 1.21 | (0.99-1.47) | 6.65E-02 | 1.35 | (1.06-1.72) | 1.47E-02 |
| rs12202536 | 1.22 | (1.05-1.41) | 9.08E-03 | 1.12 | (0.91-1.39) | 2.86E-01 | 1.32 | (1.1-1.59) | 2.37E-03 | 1.31 | (1.11-1.55) | 1.48E-03 | 1.51 | (1.21-1.89) | 2.35E-04 | 1.19 | (0.97-1.46) | 9.18E-02 | 1.38 | (1.09-1.75) | 8.36E-03 |
| rs7766610 | 1.20 | (1.04-1.39) | 1.47E-02 | 1.11 | (0.9-1.38) | 3.25E-01 | 1.30 | (1.09-1.56) | 4.24E-03 | 1.30 | (1.1-1.54) | 2.10E-03 | 1.49 | (1.2-1.86) | 3.96E-04 | 1.18 | (0.97-1.45) | 1.01E-01 | 1.36 | (1.07-1.73) | 1.32E-02 |
| rs1922018 | 1.22 | (1.06-1.42) | 7.49E-03 | 1.12 | (0.9-1.38) | 3.01E-01 | 1.34 | (1.12-1.6) | 1.59E-03 | 1.32 | (1.12-1.56) | 1.05E-03 | 1.52 | (1.22-1.9) | 1.86E-04 | 1.20 | (0.98-1.47) | 7.75E-02 | 1.37 | (1.07-1.74) | 1.11E-02 |
| rs10226228 | 1.22 | (1.05-1.41) | 1.01E-02 | 1.11 | (0.9-1.38) | 3.37E-01 | 1.33 | (1.11-1.6) | 1.87E-03 | 1.32 | (1.12-1.56) | 1.10E-03 | 1.51 | (1.21-1.89) | 2.34E-04 | 1.20 | (0.98-1.47) | 7.35E-02 | 1.38 | (1.08-1.75) | 9.39E-03 |
| rs11768481 | 1.21 | (1.05-1.41) | 1.10E-02 | 1.12 | (0.9-1.38) | 3.00E-01 | 1.31 | (1.1-1.57) | 3.19E-03 | 1.30 | (1.1-1.54) | 1.83E-03 | 1.49 | (1.19-1.85) | 4.02E-04 | 1.19 | (0.97-1.46) | 8.87E-02 | 1.36 | (1.07-1.73) | 1.21E-02 |
| rs6962772 | 1.21 | (1.04-1.4) | 1.30E-02 | 1.09 | (0.89-1.35) | 4.04E-01 | 1.33 | (1.11-1.59) | 1.93E-03 | 1.31 | (1.11-1.54) | 1.74E-03 | 1.50 | (1.2-1.87) | 3.13E-04 | 1.19 | (0.97-1.46) | 8.92E-02 | 1.36 | (1.07-1.73) | 1.17E-02 |
| rs10282292 | 1.21 | (1.04-1.4) | 1.30E-02 | 1.11 | (0.9-1.37) | 3.44E-01 | 1.31 | (1.1-1.58) | 2.99E-03 | 1.30 | (1.1-1.54) | 1.91E-03 | 1.48 | (1.19-1.85) | 4.26E-04 | 1.20 | (0.98-1.46) | 8.12E-02 | 1.37 | (1.07-1.74) | 1.14E-02 |
| rs2401924 | 1.22 | (1.05-1.41) | 9.75E-03 | 1.10 | (0.89-1.36) | 3.87E-01 | 1.35 | (1.12-1.62) | 1.23E-03 | 1.31 | (1.11-1.55) | 1.47E-03 | 1.51 | (1.21-1.88) | 2.70E-04 | 1.19 | (0.97-1.46) | 8.90E-02 | 1.38 | (1.08-1.75) | 8.77E-03 |
| rs7807019 | 1.21 | (1.05-1.41) | 1.07E-02 | 1.11 | (0.9-1.38) | 3.30E-01 | 1.33 | (1.11-1.59) | 2.27E-03 | 1.31 | (1.11-1.55) | 1.64E-03 | 1.52 | (1.22-1.89) | 2.11E-04 | 1.17 | (0.96-1.43) | 1.21E-01 | 1.37 | (1.07-1.74) | 1.14E-02 |
| rs6957896 | 1.22 | (1.05-1.41) | 9.69E-03 | 1.12 | (0.9-1.38) | 3.08E-01 | 1.32 | (1.11-1.59) | 2.27E-03 | 1.31 | (1.11-1.55) | 1.57E-03 | 1.50 | (1.2-1.87) | 3.30E-04 | 1.20 | (0.98-1.46) | 8.13E-02 | 1.36 | (1.07-1.74) | 1.13E-02 |
| rs4731925 | 1.21 | (1.04-1.4) | 1.25E-02 | 1.11 | (0.89-1.37) | 3.57E-01 | 1.32 | (1.1-1.58) | 2.41E-03 | 1.31 | (1.11-1.55) | 1.66E-03 | 1.50 | (1.2-1.87) | 3.31E-04 | 1.19 | (0.97-1.45) | 9.60E-02 | 1.34 | (1.06-1.7) | 1.64E-02 |
| rs35169606 | 1.21 | (1.05-1.41) | 1.04E-02 | 1.10 | (0.89-1.36) | 3.79E-01 | 1.34 | (1.12-1.6) | 1.56E-03 | 1.33 | (1.13-1.56) | 7.75E-04 | 1.53 | (1.23-1.9) | 1.21E-04 | 1.20 | (0.98-1.47) | 7.06E-02 | 1.35 | (1.06-1.71) | 1.55E-02 |
| rs11783093 | 1.21 | (1.04-1.4) | 1.38E-02 | 1.10 | (0.89-1.36) | 3.92E-01 | 1.33 | (1.11-1.59) | 2.14E-03 | 1.30 | (1.1-1.54) | 2.02E-03 | 1.50 | (1.2-1.87) | 3.53E-04 | 1.18 | (0.97-1.45) | 1.03E-01 | 1.36 | (1.06-1.73) | 1.35E-02 |
| rs2062882 | 1.20 | (1.04-1.39) | 1.51E-02 | 1.09 | (0.88-1.35) | 4.16E-01 | 1.32 | (1.1-1.58) | 2.54E-03 | 1.30 | (1.1-1.53) | 2.19E-03 | 1.49 | (1.19-1.85) | 4.07E-04 | 1.18 | (0.97-1.44) | 1.03E-01 | 1.34 | (1.05-1.69) | 1.73E-02 |
| rs72674867 | 1.21 | (1.04-1.4) | 1.35E-02 | 1.11 | (0.89-1.37) | 3.54E-01 | 1.32 | (1.1-1.58) | 2.79E-03 | 1.31 | (1.11-1.55) | 1.67E-03 | 1.48 | (1.19-1.84) | 4.11E-04 | 1.21 | (0.99-1.47) | 6.63E-02 | 1.36 | (1.07-1.73) | 1.28E-02 |
| rs4543592 | 1.21 | (1.04-1.4) | 1.27E-02 | 1.11 | (0.9-1.38) | 3.31E-01 | 1.31 | (1.1-1.57) | 3.04E-03 | 1.30 | (1.1-1.54) | 1.85E-03 | 1.49 | (1.19-1.85) | 3.98E-04 | 1.19 | (0.97-1.46) | 8.84E-02 | 1.36 | (1.07-1.73) | 1.33E-02 |
| rs7039819 | 1.21 | (1.04-1.4) | 1.29E-02 | 1.11 | (0.89-1.37) | 3.49E-01 | 1.32 | (1.1-1.58) | 2.57E-03 | 1.31 | (1.11-1.55) | 1.64E-03 | 1.51 | (1.21-1.88) | 2.89E-04 | 1.19 | (0.97-1.45) | 9.30E-02 | 1.35 | (1.06-1.72) | 1.40E-02 |
| rs1246265 | 1.21 | (1.04-1.4) | 1.22E-02 | 1.10 | (0.89-1.37) | 3.68E-01 | 1.33 | (1.11-1.59) | 2.07E-03 | 1.31 | (1.1-1.54) | 1.81E-03 | 1.50 | (1.2-1.87) | 3.18E-04 | 1.19 | (0.97-1.45) | 9.45E-02 | 1.36 | (1.07-1.73) | 1.23E-02 |
| rs1221148 | 1.22 | (1.06-1.42) | 7.06E-03 | 1.12 | (0.91-1.39) | 2.91E-01 | 1.34 | (1.12-1.6) | 1.60E-03 | 1.32 | (1.12-1.56) | 1.11E-03 | 1.52 | (1.22-1.9) | 1.71E-04 | 1.20 | (0.98-1.47) | 7.78E-02 | 1.37 | (1.08-1.74) | 1.00E-02 |
| rs13296519 | 1.21 | (1.04-1.4) | 1.24E-02 | 1.12 | (0.91-1.39) | 2.96E-01 | 1.31 | (1.09-1.57) | 3.56E-03 | 1.31 | (1.11-1.55) | 1.59E-03 | 1.50 | (1.2-1.87) | 3.32E-04 | 1.20 | (0.98-1.46) | 8.19E-02 | 1.35 | (1.06-1.72) | 1.47E-02 |
| rs113382419 | 1.24 | (1.07-1.43) | 5.18E-03 | 1.15 | (0.93-1.42) | 2.07E-01 | 1.34 | (1.12-1.61) | 1.70E-03 | 1.32 | (1.12-1.57) | 1.09E-03 | 1.52 | (1.22-1.91) | 2.08E-04 | 1.22 | (1-1.49) | 5.25E-02 | 1.43 | (1.13-1.81) | 3.01E-03 |
| rs11255908 | 1.22 | (1.05-1.42) | 7.70E-03 | 1.11 | (0.89-1.37) | 3.56E-01 | 1.35 | (1.13-1.62) | 1.11E-03 | 1.32 | (1.12-1.56) | 1.20E-03 | 1.51 | (1.21-1.88) | 2.75E-04 | 1.20 | (0.98-1.47) | 7.44E-02 | 1.37 | (1.08-1.75) | 9.46E-03 |
| rs2675638 | 1.21 | (1.05-1.41) | 1.07E-02 | 1.12 | (0.9-1.38) | 3.14E-01 | 1.32 | (1.1-1.58) | 2.50E-03 | 1.31 | (1.11-1.55) | 1.53E-03 | 1.53 | (1.23-1.9) | 1.43E-04 | 1.18 | (0.96-1.44) | 1.12E-01 | 1.35 | (1.06-1.72) | 1.47E-02 |
| rs10823968 | 1.22 | (1.05-1.41) | 9.15E-03 | 1.11 | (0.9-1.37) | 3.43E-01 | 1.34 | (1.12-1.6) | 1.62E-03 | 1.32 | (1.12-1.56) | 1.02E-03 | 1.51 | (1.21-1.88) | 2.60E-04 | 1.21 | (0.99-1.47) | 6.49E-02 | 1.35 | (1.06-1.72) | 1.46E-02 |
| rs17553262 | 1.21 | (1.04-1.4) | 1.30E-02 | 1.10 | (0.89-1.36) | 3.82E-01 | 1.32 | (1.11-1.59) | 2.26E-03 | 1.31 | (1.11-1.54) | 1.72E-03 | 1.49 | (1.2-1.86) | 3.61E-04 | 1.19 | (0.97-1.46) | 8.81E-02 | 1.35 | (1.06-1.71) | 1.51E-02 |
| rs7077678 | 1.22 | (1.06-1.42) | 6.71E-03 | 1.12 | (0.91-1.39) | 2.87E-01 | 1.34 | (1.12-1.6) | 1.56E-03 | 1.33 | (1.13-1.57) | 5.89E-04 | 1.53 | (1.23-1.9) | 1.16E-04 | 1.21 | (0.99-1.48) | 6.01E-02 | 1.35 | (1.06-1.72) | 1.38E-02 |
| rs12244388 | 1.21 | (1.04-1.4) | 1.30E-02 | 1.10 | (0.89-1.36) | 3.84E-01 | 1.33 | (1.11-1.59) | 2.10E-03 | 1.30 | (1.1-1.53) | 2.34E-03 | 1.49 | (1.2-1.87) | 3.83E-04 | 1.18 | (0.96-1.44) | 1.13E-01 | 1.38 | (1.09-1.76) | 8.65E-03 |
| rs3896224 | 1.21 | (1.05-1.41) | 1.02E-02 | 1.11 | (0.89-1.37) | 3.52E-01 | 1.34 | (1.12-1.6) | 1.62E-03 | 1.31 | (1.11-1.55) | 1.54E-03 | 1.50 | (1.2-1.87) | 3.47E-04 | 1.20 | (0.98-1.47) | 7.19E-02 | 1.38 | (1.08-1.75) | 9.11E-03 |
| rs34866095 | 1.21 | (1.04-1.41) | 1.14E-02 | 1.11 | (0.9-1.38) | 3.25E-01 | 1.32 | (1.1-1.58) | 2.64E-03 | 1.32 | (1.11-1.56) | 1.23E-03 | 1.51 | (1.21-1.88) | 2.54E-04 | 1.20 | (0.98-1.47) | 7.75E-02 | 1.36 | (1.07-1.73) | 1.30E-02 |
| rs75742406 | 1.21 | (1.04-1.41) | 1.14E-02 | 1.10 | (0.89-1.37) | 3.68E-01 | 1.33 | (1.11-1.6) | 1.76E-03 | 1.31 | (1.11-1.55) | 1.60E-03 | 1.51 | (1.21-1.88) | 2.69E-04 | 1.18 | (0.97-1.45) | 9.92E-02 | 1.36 | (1.07-1.74) | 1.15E-02 |
| rs17309874 | 1.22 | (1.06-1.42) | 7.23E-03 | 1.12 | (0.9-1.38) | 3.04E-01 | 1.34 | (1.12-1.6) | 1.58E-03 | 1.32 | (1.12-1.56) | 9.87E-04 | 1.53 | (1.23-1.9) | 1.58E-04 | 1.20 | (0.98-1.46) | 8.20E-02 | 1.38 | (1.09-1.75) | 8.00E-03 |
| rs4391802 | 1.20 | (1.03-1.38) | 1.70E-02 | 1.09 | (0.88-1.34) | 4.42E-01 | 1.32 | (1.1-1.58) | 2.75E-03 | 1.30 | (1.1-1.54) | 2.03E-03 | 1.48 | (1.19-1.84) | 4.60E-04 | 1.19 | (0.98-1.46) | 8.57E-02 | 1.33 | (1.05-1.68) | 1.96E-02 |
| rs112282219 | 1.21 | (1.05-1.41) | 1.07E-02 | 1.11 | (0.89-1.37) | 3.58E-01 | 1.33 | (1.11-1.6) | 1.80E-03 | 1.31 | (1.11-1.55) | 1.68E-03 | 1.49 | (1.19-1.85) | 3.95E-04 | 1.20 | (0.98-1.47) | 7.64E-02 | 1.36 | (1.07-1.73) | 1.23E-02 |
| rs9919670 | 1.22 | (1.05-1.42) | 8.79E-03 | 1.10 | (0.88-1.36) | 3.98E-01 | 1.36 | (1.13-1.63) | 9.31E-04 | 1.33 | (1.12-1.57) | 9.17E-04 | 1.55 | (1.24-1.93) | 1.05E-04 | 1.20 | (0.98-1.47) | 7.31E-02 | 1.37 | (1.07-1.74) | 1.15E-02 |
| rs74086911 | 1.21 | (1.05-1.41) | 1.04E-02 | 1.11 | (0.9-1.38) | 3.22E-01 | 1.33 | (1.11-1.59) | 2.24E-03 | 1.32 | (1.11-1.56) | 1.26E-03 | 1.51 | (1.21-1.88) | 2.62E-04 | 1.19 | (0.98-1.46) | 8.35E-02 | 1.35 | (1.06-1.71) | 1.49E-02 |
| rs7297175 | 1.21 | (1.04-1.4) | 1.25E-02 | 1.10 | (0.89-1.36) | 3.82E-01 | 1.33 | (1.11-1.59) | 2.07E-03 | 1.29 | (1.1-1.53) | 2.24E-03 | 1.48 | (1.19-1.85) | 4.07E-04 | 1.17 | (0.96-1.43) | 1.18E-01 | 1.38 | (1.09-1.75) | 8.51E-03 |
| rs10879871 | 1.21 | (1.05-1.41) | 1.07E-02 | 1.11 | (0.9-1.38) | 3.30E-01 | 1.32 | (1.11-1.59) | 2.32E-03 | 1.31 | (1.11-1.55) | 1.55E-03 | 1.49 | (1.2-1.86) | 3.90E-04 | 1.21 | (0.99-1.47) | 6.75E-02 | 1.36 | (1.07-1.73) | 1.24E-02 |
| rs12831617 | 1.22 | (1.05-1.41) | 9.78E-03 | 1.12 | (0.9-1.38) | 3.10E-01 | 1.33 | (1.11-1.59) | 2.20E-03 | 1.31 | (1.11-1.55) | 1.40E-03 | 1.51 | (1.21-1.88) | 2.52E-04 | 1.20 | (0.98-1.46) | 8.05E-02 | 1.36 | (1.07-1.73) | 1.19E-02 |
| rs6562474 | 1.21 | (1.04-1.4) | 1.32E-02 | 1.10 | (0.89-1.37) | 3.62E-01 | 1.32 | (1.1-1.58) | 2.58E-03 | 1.30 | (1.1-1.54) | 1.96E-03 | 1.48 | (1.19-1.84) | 4.18E-04 | 1.19 | (0.97-1.46) | 8.76E-02 | 1.36 | (1.07-1.73) | 1.17E-02 |
| rs7333559 | 1.22 | (1.05-1.41) | 8.52E-03 | 1.11 | (0.89-1.37) | 3.47E-01 | 1.34 | (1.12-1.61) | 1.42E-03 | 1.31 | (1.11-1.55) | 1.53E-03 | 1.50 | (1.2-1.87) | 3.51E-04 | 1.20 | (0.98-1.47) | 7.20E-02 | 1.38 | (1.09-1.75) | 7.40E-03 |
| rs860326 | 1.21 | (1.04-1.4) | 1.26E-02 | 1.11 | (0.89-1.37) | 3.54E-01 | 1.32 | (1.1-1.58) | 2.62E-03 | 1.31 | (1.1-1.54) | 1.78E-03 | 1.51 | (1.21-1.89) | 2.44E-04 | 1.18 | (0.97-1.44) | 1.03E-01 | 1.36 | (1.07-1.73) | 1.34E-02 |
| rs7155595 | 1.20 | (1.04-1.39) | 1.42E-02 | 1.10 | (0.89-1.35) | 3.99E-01 | 1.31 | (1.09-1.57) | 3.39E-03 | 1.30 | (1.1-1.53) | 2.09E-03 | 1.49 | (1.19-1.85) | 4.09E-04 | 1.19 | (0.97-1.45) | 9.57E-02 | 1.34 | (1.06-1.71) | 1.61E-02 |
| rs3742365 | 1.20 | (1.04-1.39) | 1.55E-02 | 1.12 | (0.91-1.39) | 2.96E-01 | 1.30 | (1.08-1.55) | 5.11E-03 | 1.30 | (1.1-1.54) | 2.04E-03 | 1.48 | (1.19-1.85) | 4.70E-04 | 1.19 | (0.97-1.46) | 9.05E-02 | 1.33 | (1.05-1.69) | 1.92E-02 |
| rs35175834 | 1.19 | (1.03-1.38) | 1.99E-02 | 1.09 | (0.88-1.34) | 4.46E-01 | 1.31 | (1.09-1.57) | 3.69E-03 | 1.30 | (1.1-1.54) | 2.26E-03 | 1.49 | (1.19-1.86) | 4.37E-04 | 1.18 | (0.97-1.45) | 1.05E-01 | 1.32 | (1.04-1.67) | 2.42E-02 |
| rs28485305 | 1.22 | (1.05-1.42) | 7.76E-03 | 1.13 | (0.91-1.39) | 2.69E-01 | 1.33 | (1.11-1.59) | 2.11E-03 | 1.32 | (1.12-1.56) | 1.15E-03 | 1.51 | (1.21-1.88) | 2.51E-04 | 1.20 | (0.98-1.47) | 7.22E-02 | 1.38 | (1.09-1.75) | 7.40E-03 |
| rs8042849 | 1.22 | (1.05-1.41) | 1.06E-02 | 1.11 | (0.9-1.38) | 3.25E-01 | 1.33 | (1.11-1.6) | 2.18E-03 | 1.32 | (1.12-1.57) | 1.17E-03 | 1.52 | (1.22-1.91) | 2.29E-04 | 1.20 | (0.98-1.47) | 8.45E-02 | 1.36 | (1.06-1.73) | 1.44E-02 |
| rs8042134 | 1.21 | (1.04-1.4) | 1.27E-02 | 1.10 | (0.89-1.36) | 3.73E-01 | 1.33 | (1.11-1.59) | 2.11E-03 | 1.31 | (1.11-1.55) | 1.70E-03 | 1.51 | (1.21-1.88) | 2.58E-04 | 1.19 | (0.97-1.45) | 9.88E-02 | 1.35 | (1.06-1.72) | 1.48E-02 |
| rs6598539 | 1.20 | (1.04-1.39) | 1.43E-02 | 1.10 | (0.89-1.36) | 3.72E-01 | 1.31 | (1.1-1.57) | 3.02E-03 | 1.30 | (1.1-1.54) | 1.95E-03 | 1.50 | (1.2-1.87) | 3.42E-04 | 1.19 | (0.97-1.45) | 9.82E-02 | 1.34 | (1.06-1.71) | 1.57E-02 |
| rs11861214 | 1.21 | (1.04-1.4) | 1.28E-02 | 1.10 | (0.89-1.37) | 3.60E-01 | 1.32 | (1.1-1.58) | 2.41E-03 | 1.30 | (1.1-1.54) | 1.86E-03 | 1.50 | (1.21-1.88) | 2.94E-04 | 1.18 | (0.97-1.44) | 1.05E-01 | 1.35 | (1.06-1.72) | 1.36E-02 |
| rs12708665 | 1.20 | (1.04-1.39) | 1.51E-02 | 1.09 | (0.89-1.35) | 4.03E-01 | 1.32 | (1.1-1.58) | 2.73E-03 | 1.30 | (1.1-1.53) | 2.20E-03 | 1.50 | (1.2-1.86) | 3.53E-04 | 1.18 | (0.96-1.44) | 1.08E-01 | 1.36 | (1.07-1.74) | 1.16E-02 |
| rs57611503 | 1.21 | (1.04-1.4) | 1.33E-02 | 1.10 | (0.89-1.36) | 3.75E-01 | 1.32 | (1.11-1.59) | 2.33E-03 | 1.31 | (1.11-1.55) | 1.61E-03 | 1.51 | (1.21-1.88) | 2.51E-04 | 1.18 | (0.97-1.45) | 9.87E-02 | 1.35 | (1.06-1.72) | 1.44E-02 |
| rs889398 | 1.20 | (1.04-1.39) | 1.50E-02 | 1.10 | (0.89-1.36) | 3.85E-01 | 1.32 | (1.1-1.58) | 2.81E-03 | 1.30 | (1.1-1.53) | 2.17E-03 | 1.49 | (1.2-1.86) | 3.67E-04 | 1.18 | (0.96-1.44) | 1.13E-01 | 1.36 | (1.07-1.74) | 1.17E-02 |
| rs60952428 | 1.20 | (1.04-1.4) | 1.36E-02 | 1.10 | (0.89-1.36) | 3.83E-01 | 1.32 | (1.1-1.58) | 2.40E-03 | 1.30 | (1.1-1.54) | 1.92E-03 | 1.50 | (1.2-1.87) | 3.39E-04 | 1.19 | (0.97-1.45) | 9.69E-02 | 1.36 | (1.07-1.73) | 1.24E-02 |
| rs1050847 | 1.22 | (1.05-1.42) | 7.52E-03 | 1.11 | (0.9-1.38) | 3.19E-01 | 1.34 | (1.12-1.61) | 1.42E-03 | 1.32 | (1.12-1.56) | 8.40E-04 | 1.51 | (1.21-1.88) | 2.41E-04 | 1.21 | (0.99-1.47) | 6.48E-02 | 1.35 | (1.06-1.72) | 1.34E-02 |
| rs369230 | 1.20 | (1.04-1.39) | 1.52E-02 | 1.09 | (0.88-1.35) | 4.17E-01 | 1.32 | (1.1-1.58) | 2.50E-03 | 1.29 | (1.1-1.52) | 2.26E-03 | 1.47 | (1.19-1.83) | 4.30E-04 | 1.18 | (0.96-1.44) | 1.08E-01 | 1.36 | (1.07-1.73) | 1.27E-02 |
| rs8614 | 1.20 | (1.03-1.39) | 1.59E-02 | 1.10 | (0.89-1.36) | 3.93E-01 | 1.31 | (1.09-1.57) | 3.46E-03 | 1.30 | (1.1-1.54) | 1.91E-03 | 1.48 | (1.19-1.85) | 4.21E-04 | 1.20 | (0.98-1.46) | 8.18E-02 | 1.33 | (1.05-1.68) | 1.93E-02 |
| rs732083 | 1.19 | (1.03-1.38) | 1.66E-02 | 1.09 | (0.88-1.34) | 4.39E-01 | 1.31 | (1.1-1.57) | 3.05E-03 | 1.30 | (1.1-1.54) | 1.99E-03 | 1.49 | (1.19-1.85) | 3.92E-04 | 1.19 | (0.97-1.45) | 9.64E-02 | 1.32 | (1.05-1.67) | 1.89E-02 |
| rs9904288 | 1.22 | (1.06-1.42) | 7.04E-03 | 1.13 | (0.91-1.39) | 2.73E-01 | 1.33 | (1.11-1.6) | 1.76E-03 | 1.33 | (1.12-1.56) | 8.22E-04 | 1.51 | (1.21-1.89) | 2.25E-04 | 1.21 | (1-1.48) | 5.50E-02 | 1.37 | (1.08-1.75) | 9.07E-03 |
| rs67596067 | 1.21 | (1.04-1.41) | 1.14E-02 | 1.11 | (0.89-1.37) | 3.51E-01 | 1.32 | (1.1-1.59) | 2.37E-03 | 1.31 | (1.11-1.55) | 1.61E-03 | 1.51 | (1.21-1.88) | 2.66E-04 | 1.19 | (0.97-1.45) | 9.68E-02 | 1.35 | (1.06-1.72) | 1.43E-02 |
| rs12967855 | 1.21 | (1.04-1.41) | 1.11E-02 | 1.11 | (0.9-1.38) | 3.29E-01 | 1.32 | (1.1-1.58) | 2.45E-03 | 1.31 | (1.11-1.55) | 1.52E-03 | 1.50 | (1.2-1.87) | 3.33E-04 | 1.20 | (0.98-1.46) | 8.06E-02 | 1.36 | (1.07-1.73) | 1.31E-02 |
| rs62098013 | 1.20 | (1.04-1.39) | 1.42E-02 | 1.10 | (0.89-1.36) | 3.77E-01 | 1.32 | (1.1-1.58) | 2.78E-03 | 1.31 | (1.1-1.54) | 1.79E-03 | 1.50 | (1.21-1.88) | 2.97E-04 | 1.18 | (0.97-1.45) | 1.01E-01 | 1.35 | (1.06-1.72) | 1.43E-02 |
| rs71367545 | 1.20 | (1.04-1.39) | 1.50E-02 | 1.09 | (0.88-1.35) | 4.15E-01 | 1.32 | (1.11-1.59) | 2.31E-03 | 1.30 | (1.1-1.54) | 1.87E-03 | 1.50 | (1.2-1.87) | 3.15E-04 | 1.18 | (0.97-1.45) | 9.94E-02 | 1.33 | (1.05-1.69) | 1.79E-02 |
| rs76608582 | 1.20 | (1.04-1.39) | 1.38E-02 | 1.10 | (0.89-1.36) | 3.92E-01 | 1.32 | (1.1-1.58) | 2.43E-03 | 1.29 | (1.1-1.52) | 2.12E-03 | 1.49 | (1.2-1.86) | 3.70E-04 | 1.17 | (0.96-1.43) | 1.13E-01 | 1.37 | (1.08-1.74) | 1.05E-02 |
| rs35343344 | 1.21 | (1.05-1.41) | 1.10E-02 | 1.10 | (0.89-1.36) | 3.89E-01 | 1.34 | (1.12-1.61) | 1.50E-03 | 1.31 | (1.11-1.55) | 1.36E-03 | 1.53 | (1.23-1.9) | 1.24E-04 | 1.18 | (0.97-1.45) | 1.01E-01 | 1.36 | (1.07-1.73) | 1.21E-02 |
| rs4814873 | 1.22 | (1.05-1.41) | 9.81E-03 | 1.11 | (0.9-1.38) | 3.23E-01 | 1.33 | (1.11-1.59) | 1.97E-03 | 1.31 | (1.11-1.55) | 1.48E-03 | 1.51 | (1.21-1.88) | 2.73E-04 | 1.19 | (0.97-1.46) | 8.71E-02 | 1.37 | (1.08-1.74) | 9.92E-03 |
| rs6119897 | 1.21 | (1.04-1.4) | 1.35E-02 | 1.10 | (0.89-1.36) | 3.83E-01 | 1.33 | (1.11-1.59) | 2.17E-03 | 1.30 | (1.1-1.54) | 1.99E-03 | 1.49 | (1.2-1.86) | 3.72E-04 | 1.19 | (0.97-1.45) | 9.53E-02 | 1.36 | (1.07-1.73) | 1.27E-02 |
| rs12481282 | 1.21 | (1.04-1.4) | 1.31E-02 | 1.09 | (0.88-1.35) | 4.14E-01 | 1.34 | (1.11-1.6) | 1.70E-03 | 1.30 | (1.1-1.53) | 2.08E-03 | 1.50 | (1.2-1.87) | 3.04E-04 | 1.18 | (0.96-1.44) | 1.09E-01 | 1.36 | (1.07-1.73) | 1.19E-02 |
| rs348809 | 1.21 | (1.05-1.41) | 1.03E-02 | 1.12 | (0.9-1.38) | 3.09E-01 | 1.32 | (1.1-1.58) | 2.50E-03 | 1.31 | (1.11-1.55) | 1.57E-03 | 1.50 | (1.2-1.87) | 3.47E-04 | 1.20 | (0.98-1.46) | 8.28E-02 | 1.36 | (1.07-1.73) | 1.27E-02 |
| rs6011779 | 1.20 | (1.03-1.39) | 1.79E-02 | 1.11 | (0.89-1.37) | 3.63E-01 | 1.30 | (1.08-1.56) | 5.00E-03 | 1.31 | (1.11-1.55) | 1.75E-03 | 1.51 | (1.21-1.89) | 2.56E-04 | 1.18 | (0.96-1.45) | 1.07E-01 | 1.31 | (1.03-1.66) | 2.78E-02 |
| rs147412694 | 1.23 | (1.06-1.42) | 6.41E-03 | 1.13 | (0.91-1.39) | 2.68E-01 | 1.33 | (1.11-1.6) | 1.75E-03 | 1.33 | (1.13-1.57) | 7.65E-04 | 1.52 | (1.22-1.89) | 2.06E-04 | 1.21 | (0.99-1.47) | 6.37E-02 | 1.36 | (1.07-1.73) | 1.20E-02 |
| rs2838834 | 1.21 | (1.04-1.41) | 1.15E-02 | 1.11 | (0.89-1.37) | 3.46E-01 | 1.32 | (1.11-1.59) | 2.33E-03 | 1.31 | (1.11-1.55) | 1.51E-03 | 1.50 | (1.2-1.87) | 3.04E-04 | 1.20 | (0.98-1.47) | 7.77E-02 | 1.35 | (1.06-1.72) | 1.43E-02 |
| rs136233 | 1.21 | (1.05-1.41) | 1.10E-02 | 1.11 | (0.9-1.38) | 3.28E-01 | 1.32 | (1.11-1.59) | 2.30E-03 | 1.31 | (1.11-1.55) | 1.49E-03 | 1.50 | (1.21-1.88) | 2.95E-04 | 1.19 | (0.97-1.46) | 8.97E-02 | 1.35 | (1.06-1.72) | 1.39E-02 |
| rs202645 | 1.21 | (1.05-1.41) | 1.08E-02 | 1.12 | (0.9-1.38) | 3.04E-01 | 1.32 | (1.1-1.58) | 2.60E-03 | 1.31 | (1.11-1.55) | 1.41E-03 | 1.50 | (1.2-1.87) | 3.36E-04 | 1.21 | (0.99-1.47) | 6.77E-02 | 1.36 | (1.07-1.73) | 1.18E-02 |
| (B) Ever having smoked regularly | | | | | | | | | | | | | | | | | | | | | |
| rs301807 | 0.97 | (0.86-1.1) | 6.60E-01 | 0.94 | (0.8-1.1) | 4.10E-01 | 1.01 | (0.87-1.18) | 8.55E-01 | 0.99 | (0.86-1.13) | 8.29E-01 | 0.99 | (0.84-1.17) | 9.15E-01 | 0.97 | (0.82-1.15) | 7.65E-01 | 1.00 | (0.82-1.2) | 9.60E-01 |
| rs2637869 | 0.98 | (0.87-1.11) | 7.50E-01 | 0.94 | (0.8-1.1) | 4.38E-01 | 1.03 | (0.88-1.19) | 7.37E-01 | 0.99 | (0.87-1.14) | 9.03E-01 | 1.01 | (0.85-1.19) | 9.35E-01 | 0.98 | (0.82-1.15) | 7.76E-01 | 1.01 | (0.84-1.22) | 9.00E-01 |
| rs951740 | 0.97 | (0.86-1.11) | 6.92E-01 | 0.94 | (0.8-1.1) | 4.14E-01 | 1.02 | (0.88-1.19) | 7.85E-01 | 0.99 | (0.87-1.14) | 9.24E-01 | 1.00 | (0.85-1.18) | 9.94E-01 | 0.98 | (0.83-1.16) | 8.47E-01 | 0.98 | (0.82-1.19) | 8.74E-01 |
| rs12022778 | 0.97 | (0.86-1.1) | 6.20E-01 | 0.93 | (0.8-1.1) | 4.05E-01 | 1.01 | (0.87-1.17) | 9.14E-01 | 0.98 | (0.86-1.12) | 7.76E-01 | 1.00 | (0.85-1.18) | 9.83E-01 | 0.96 | (0.81-1.14) | 6.59E-01 | 1.01 | (0.83-1.21) | 9.50E-01 |
| rs10789369 | 0.98 | (0.86-1.11) | 7.36E-01 | 0.94 | (0.8-1.1) | 4.45E-01 | 1.02 | (0.88-1.19) | 7.74E-01 | 1.00 | (0.87-1.14) | 9.63E-01 | 1.02 | (0.86-1.2) | 8.56E-01 | 0.98 | (0.82-1.16) | 7.82E-01 | 0.99 | (0.82-1.19) | 8.92E-01 |
| rs12027999 | 0.98 | (0.86-1.11) | 7.38E-01 | 0.94 | (0.8-1.1) | 4.25E-01 | 1.03 | (0.88-1.19) | 7.39E-01 | 0.99 | (0.87-1.14) | 9.26E-01 | 1.00 | (0.85-1.18) | 9.71E-01 | 0.98 | (0.83-1.16) | 8.43E-01 | 1.01 | (0.84-1.22) | 9.04E-01 |
| rs147052174 | 0.97 | (0.86-1.1) | 6.85E-01 | 0.93 | (0.8-1.09) | 3.95E-01 | 1.02 | (0.88-1.18) | 7.87E-01 | 0.99 | (0.86-1.13) | 8.51E-01 | 1.00 | (0.85-1.18) | 9.80E-01 | 0.97 | (0.82-1.15) | 7.53E-01 | 1.00 | (0.83-1.2) | 9.78E-01 |
| rs12739243 | 0.98 | (0.86-1.1) | 6.91E-01 | 0.93 | (0.8-1.09) | 3.82E-01 | 1.02 | (0.88-1.19) | 7.52E-01 | 0.99 | (0.86-1.13) | 8.43E-01 | 1.01 | (0.85-1.19) | 9.31E-01 | 0.97 | (0.82-1.14) | 6.95E-01 | 1.00 | (0.83-1.21) | 9.92E-01 |
| rs62106258 | 0.97 | (0.85-1.09) | 5.94E-01 | 0.93 | (0.79-1.09) | 3.55E-01 | 1.01 | (0.87-1.17) | 8.86E-01 | 0.98 | (0.86-1.12) | 7.50E-01 | 0.99 | (0.84-1.16) | 8.92E-01 | 0.96 | (0.81-1.14) | 6.65E-01 | 0.99 | (0.82-1.2) | 9.34E-01 |
| rs6731872 | 0.97 | (0.85-1.1) | 6.04E-01 | 0.93 | (0.8-1.09) | 3.93E-01 | 1.01 | (0.87-1.17) | 9.35E-01 | 0.98 | (0.85-1.12) | 7.29E-01 | 0.99 | (0.84-1.17) | 9.20E-01 | 0.96 | (0.81-1.14) | 6.41E-01 | 0.99 | (0.82-1.2) | 9.21E-01 |
| rs1004787 | 0.99 | (0.87-1.12) | 8.36E-01 | 0.95 | (0.81-1.11) | 4.86E-01 | 1.03 | (0.89-1.2) | 6.71E-01 | 1.00 | (0.87-1.15) | 9.94E-01 | 1.01 | (0.86-1.19) | 8.92E-01 | 0.98 | (0.83-1.17) | 8.55E-01 | 1.02 | (0.84-1.23) | 8.75E-01 |
| rs6750107 | 0.98 | (0.86-1.11) | 7.05E-01 | 0.94 | (0.8-1.1) | 4.39E-01 | 1.02 | (0.88-1.18) | 8.06E-01 | 0.99 | (0.86-1.13) | 8.46E-01 | 1.00 | (0.85-1.18) | 9.67E-01 | 0.97 | (0.82-1.15) | 7.23E-01 | 1.00 | (0.83-1.21) | 9.97E-01 |
| rs1901477 | 0.97 | (0.86-1.1) | 6.52E-01 | 0.94 | (0.8-1.1) | 4.26E-01 | 1.01 | (0.87-1.17) | 8.91E-01 | 0.98 | (0.85-1.12) | 7.73E-01 | 1.00 | (0.85-1.18) | 9.87E-01 | 0.96 | (0.81-1.13) | 5.95E-01 | 0.99 | (0.82-1.19) | 9.04E-01 |
| rs3811038 | 0.97 | (0.86-1.1) | 6.22E-01 | 0.93 | (0.79-1.09) | 3.53E-01 | 1.02 | (0.88-1.18) | 8.40E-01 | 0.98 | (0.86-1.13) | 8.25E-01 | 1.00 | (0.85-1.18) | 9.88E-01 | 0.97 | (0.82-1.14) | 6.81E-01 | 0.98 | (0.82-1.18) | 8.32E-01 |
| rs6756212 | 0.98 | (0.87-1.11) | 7.73E-01 | 0.94 | (0.8-1.1) | 4.53E-01 | 1.03 | (0.89-1.19) | 7.11E-01 | 1.00 | (0.87-1.15) | 9.81E-01 | 1.01 | (0.85-1.19) | 9.10E-01 | 0.99 | (0.84-1.17) | 9.09E-01 | 1.00 | (0.83-1.21) | 9.93E-01 |
| rs16826827 | 0.98 | (0.86-1.11) | 7.12E-01 | 0.94 | (0.8-1.1) | 4.15E-01 | 1.02 | (0.88-1.19) | 7.70E-01 | 0.99 | (0.86-1.13) | 8.39E-01 | 1.00 | (0.85-1.18) | 9.78E-01 | 0.97 | (0.82-1.15) | 7.04E-01 | 1.00 | (0.83-1.21) | 9.94E-01 |
| rs748832 | 0.97 | (0.86-1.1) | 6.69E-01 | 0.94 | (0.8-1.1) | 4.11E-01 | 1.02 | (0.88-1.18) | 8.21E-01 | 0.98 | (0.86-1.13) | 8.25E-01 | 0.99 | (0.84-1.17) | 9.49E-01 | 0.97 | (0.82-1.15) | 7.54E-01 | 0.99 | (0.82-1.19) | 9.06E-01 |
| rs10446419 | 0.98 | (0.86-1.11) | 7.11E-01 | 0.94 | (0.8-1.1) | 4.24E-01 | 1.02 | (0.88-1.19) | 7.75E-01 | 0.99 | (0.87-1.13) | 8.93E-01 | 1.01 | (0.85-1.19) | 9.40E-01 | 0.97 | (0.82-1.15) | 7.47E-01 | 1.00 | (0.83-1.21) | 9.84E-01 |
| rs2526390 | 0.97 | (0.86-1.1) | 6.91E-01 | 0.93 | (0.79-1.09) | 3.63E-01 | 1.03 | (0.88-1.19) | 7.39E-01 | 0.99 | (0.86-1.13) | 8.35E-01 | 0.99 | (0.84-1.17) | 9.38E-01 | 0.98 | (0.83-1.16) | 7.87E-01 | 1.00 | (0.83-1.2) | 9.69E-01 |
| rs11128203 | 0.98 | (0.86-1.11) | 6.96E-01 | 0.94 | (0.8-1.1) | 4.16E-01 | 1.02 | (0.88-1.18) | 7.96E-01 | 0.99 | (0.86-1.13) | 8.77E-01 | 1.01 | (0.85-1.19) | 9.50E-01 | 0.97 | (0.82-1.15) | 7.44E-01 | 1.00 | (0.83-1.21) | 9.97E-01 |
| rs62246017 | 0.98 | (0.87-1.11) | 7.46E-01 | 0.94 | (0.8-1.1) | 4.30E-01 | 1.03 | (0.89-1.19) | 7.34E-01 | 0.99 | (0.87-1.14) | 9.42E-01 | 1.00 | (0.85-1.18) | 9.83E-01 | 0.98 | (0.84-1.16) | 8.57E-01 | 1.00 | (0.83-1.2) | 9.70E-01 |
| rs1549979 | 0.99 | (0.88-1.12) | 8.90E-01 | 0.95 | (0.81-1.11) | 5.37E-01 | 1.04 | (0.9-1.2) | 6.21E-01 | 1.01 | (0.88-1.15) | 9.11E-01 | 1.02 | (0.87-1.2) | 8.14E-01 | 0.99 | (0.84-1.17) | 9.40E-01 | 1.02 | (0.85-1.23) | 8.13E-01 |
| rs1187820 | 0.97 | (0.86-1.1) | 6.79E-01 | 0.94 | (0.8-1.1) | 4.28E-01 | 1.02 | (0.88-1.18) | 8.40E-01 | 0.99 | (0.86-1.13) | 8.43E-01 | 1.00 | (0.85-1.18) | 9.81E-01 | 0.97 | (0.82-1.15) | 7.21E-01 | 0.99 | (0.82-1.2) | 9.56E-01 |
| rs59537158 | 0.97 | (0.85-1.1) | 6.04E-01 | 0.93 | (0.79-1.09) | 3.67E-01 | 1.01 | (0.87-1.17) | 8.83E-01 | 0.98 | (0.86-1.12) | 7.88E-01 | 1.00 | (0.84-1.18) | 9.66E-01 | 0.97 | (0.82-1.14) | 6.88E-01 | 0.99 | (0.82-1.19) | 8.75E-01 |
| rs55944129 | 0.97 | (0.86-1.1) | 6.66E-01 | 0.93 | (0.8-1.09) | 4.02E-01 | 1.02 | (0.88-1.18) | 8.31E-01 | 0.99 | (0.86-1.13) | 8.30E-01 | 1.01 | (0.85-1.19) | 9.50E-01 | 0.96 | (0.82-1.14) | 6.69E-01 | 1.00 | (0.83-1.2) | 9.68E-01 |
| rs58400863 | 0.98 | (0.86-1.11) | 7.11E-01 | 0.94 | (0.8-1.1) | 4.42E-01 | 1.02 | (0.88-1.18) | 8.18E-01 | 0.99 | (0.86-1.13) | 8.88E-01 | 1.01 | (0.86-1.19) | 9.09E-01 | 0.97 | (0.82-1.15) | 7.18E-01 | 1.00 | (0.83-1.2) | 9.86E-01 |
| rs7696257 | 0.97 | (0.86-1.1) | 6.24E-01 | 0.93 | (0.79-1.09) | 3.53E-01 | 1.02 | (0.88-1.18) | 8.32E-01 | 0.98 | (0.86-1.13) | 8.07E-01 | 0.99 | (0.84-1.17) | 9.41E-01 | 0.97 | (0.82-1.15) | 7.13E-01 | 0.99 | (0.82-1.2) | 9.52E-01 |
| rs13109980 | 0.97 | (0.86-1.1) | 6.21E-01 | 0.93 | (0.79-1.09) | 3.62E-01 | 1.01 | (0.87-1.18) | 8.55E-01 | 0.98 | (0.86-1.13) | 8.09E-01 | 0.99 | (0.84-1.17) | 9.22E-01 | 0.97 | (0.82-1.15) | 7.61E-01 | 0.99 | (0.82-1.2) | 9.31E-01 |
| rs13110073 | 0.97 | (0.86-1.1) | 6.39E-01 | 0.93 | (0.79-1.09) | 3.71E-01 | 1.02 | (0.88-1.18) | 8.36E-01 | 0.98 | (0.86-1.13) | 8.25E-01 | 1.00 | (0.85-1.18) | 9.73E-01 | 0.96 | (0.81-1.14) | 6.71E-01 | 1.00 | (0.82-1.2) | 9.67E-01 |
| rs71592686 | 0.97 | (0.86-1.1) | 6.84E-01 | 0.93 | (0.8-1.09) | 3.83E-01 | 1.02 | (0.88-1.19) | 7.60E-01 | 0.99 | (0.86-1.13) | 8.54E-01 | 1.01 | (0.85-1.19) | 9.51E-01 | 0.97 | (0.82-1.15) | 7.14E-01 | 1.00 | (0.83-1.2) | 9.83E-01 |
| rs6452785 | 0.99 | (0.88-1.12) | 8.75E-01 | 0.95 | (0.81-1.11) | 5.36E-01 | 1.03 | (0.89-1.2) | 6.48E-01 | 1.00 | (0.87-1.15) | 9.95E-01 | 1.02 | (0.86-1.2) | 8.48E-01 | 0.98 | (0.83-1.16) | 8.44E-01 | 1.01 | (0.83-1.22) | 9.32E-01 |
| rs42417 | 0.97 | (0.86-1.1) | 6.49E-01 | 0.94 | (0.8-1.1) | 4.42E-01 | 1.01 | (0.87-1.16) | 9.27E-01 | 0.98 | (0.86-1.13) | 8.01E-01 | 0.99 | (0.84-1.17) | 9.34E-01 | 0.97 | (0.82-1.15) | 7.30E-01 | 1.00 | (0.83-1.21) | 9.91E-01 |
| rs329124 | 0.97 | (0.86-1.1) | 6.49E-01 | 0.93 | (0.8-1.09) | 3.79E-01 | 1.02 | (0.88-1.18) | 8.16E-01 | 0.98 | (0.86-1.13) | 8.00E-01 | 1.00 | (0.85-1.18) | 9.91E-01 | 0.96 | (0.81-1.14) | 6.66E-01 | 0.99 | (0.82-1.19) | 9.06E-01 |
| rs1173461 | 0.97 | (0.86-1.1) | 6.14E-01 | 0.93 | (0.79-1.09) | 3.48E-01 | 1.02 | (0.88-1.18) | 8.37E-01 | 0.98 | (0.86-1.12) | 7.60E-01 | 1.00 | (0.85-1.18) | 9.80E-01 | 0.96 | (0.81-1.13) | 6.18E-01 | 1.00 | (0.83-1.2) | 9.69E-01 |
| rs6890961 | 0.97 | (0.86-1.1) | 6.48E-01 | 0.93 | (0.8-1.09) | 3.83E-01 | 1.02 | (0.88-1.18) | 8.24E-01 | 0.98 | (0.85-1.12) | 7.39E-01 | 0.99 | (0.84-1.17) | 9.11E-01 | 0.96 | (0.81-1.14) | 6.51E-01 | 1.01 | (0.83-1.21) | 9.46E-01 |
| rs2173019 | 0.97 | (0.86-1.1) | 6.45E-01 | 0.94 | (0.8-1.1) | 4.13E-01 | 1.01 | (0.87-1.17) | 8.95E-01 | 0.99 | (0.86-1.13) | 8.62E-01 | 1.00 | (0.85-1.18) | 9.80E-01 | 0.97 | (0.82-1.15) | 7.39E-01 | 1.00 | (0.83-1.21) | 9.85E-01 |
| rs1150668 | 0.98 | (0.86-1.11) | 7.34E-01 | 0.94 | (0.8-1.1) | 4.55E-01 | 1.02 | (0.88-1.18) | 7.96E-01 | 0.99 | (0.86-1.13) | 8.92E-01 | 1.00 | (0.85-1.18) | 9.94E-01 | 0.98 | (0.83-1.16) | 8.13E-01 | 1.00 | (0.83-1.21) | 9.90E-01 |
| rs7743165 | 0.98 | (0.87-1.11) | 7.56E-01 | 0.94 | (0.81-1.11) | 4.78E-01 | 1.02 | (0.88-1.18) | 7.83E-01 | 0.99 | (0.86-1.13) | 8.61E-01 | 1.00 | (0.85-1.19) | 9.57E-01 | 0.97 | (0.82-1.15) | 7.23E-01 | 1.01 | (0.84-1.22) | 8.77E-01 |
| rs10945141 | 0.98 | (0.86-1.11) | 7.21E-01 | 0.94 | (0.81-1.1) | 4.74E-01 | 1.02 | (0.88-1.18) | 8.43E-01 | 0.99 | (0.86-1.13) | 8.45E-01 | 1.00 | (0.85-1.18) | 9.61E-01 | 0.97 | (0.82-1.15) | 7.01E-01 | 1.00 | (0.83-1.21) | 9.99E-01 |
| rs17554906 | 0.98 | (0.86-1.11) | 7.07E-01 | 0.94 | (0.81-1.1) | 4.59E-01 | 1.02 | (0.88-1.18) | 8.43E-01 | 0.98 | (0.86-1.13) | 8.13E-01 | 1.00 | (0.84-1.17) | 9.53E-01 | 0.97 | (0.82-1.15) | 7.06E-01 | 1.00 | (0.83-1.21) | 9.61E-01 |
| rs12195240 | 0.98 | (0.86-1.11) | 7.49E-01 | 0.93 | (0.8-1.09) | 3.99E-01 | 1.03 | (0.89-1.19) | 6.96E-01 | 1.00 | (0.87-1.14) | 9.53E-01 | 1.01 | (0.86-1.19) | 9.07E-01 | 0.98 | (0.83-1.16) | 8.05E-01 | 1.01 | (0.84-1.22) | 8.93E-01 |
| rs118202 | 0.96 | (0.85-1.09) | 5.63E-01 | 0.94 | (0.8-1.1) | 4.16E-01 | 1.00 | (0.86-1.15) | 9.67E-01 | 0.97 | (0.85-1.12) | 7.06E-01 | 0.99 | (0.83-1.16) | 8.62E-01 | 0.96 | (0.81-1.14) | 6.36E-01 | 0.99 | (0.82-1.2) | 9.52E-01 |
| rs10272990 | 0.98 | (0.87-1.11) | 7.85E-01 | 0.96 | (0.82-1.11) | 5.57E-01 | 1.02 | (0.88-1.18) | 8.43E-01 | 0.99 | (0.87-1.14) | 9.27E-01 | 1.00 | (0.85-1.18) | 9.99E-01 | 0.98 | (0.83-1.16) | 8.53E-01 | 1.01 | (0.84-1.22) | 8.96E-01 |
| rs13237637 | 0.98 | (0.87-1.11) | 7.94E-01 | 0.94 | (0.8-1.1) | 4.64E-01 | 1.03 | (0.89-1.19) | 6.95E-01 | 1.00 | (0.87-1.14) | 9.70E-01 | 1.01 | (0.86-1.2) | 8.73E-01 | 0.98 | (0.83-1.16) | 8.25E-01 | 1.01 | (0.84-1.22) | 9.24E-01 |
| rs7809303 | 0.97 | (0.86-1.1) | 6.57E-01 | 0.93 | (0.8-1.09) | 3.78E-01 | 1.02 | (0.88-1.18) | 8.27E-01 | 0.99 | (0.86-1.13) | 8.59E-01 | 1.00 | (0.84-1.18) | 9.58E-01 | 0.98 | (0.83-1.16) | 7.97E-01 | 1.00 | (0.83-1.21) | 9.99E-01 |
| rs7802996 | 0.97 | (0.86-1.1) | 6.33E-01 | 0.93 | (0.8-1.09) | 3.77E-01 | 1.01 | (0.87-1.18) | 8.48E-01 | 0.98 | (0.86-1.13) | 8.15E-01 | 1.00 | (0.85-1.18) | 9.65E-01 | 0.96 | (0.82-1.14) | 6.77E-01 | 0.99 | (0.82-1.2) | 9.53E-01 |
| rs76841737 | 0.97 | (0.86-1.1) | 6.30E-01 | 0.93 | (0.79-1.09) | 3.60E-01 | 1.02 | (0.88-1.18) | 8.37E-01 | 0.98 | (0.86-1.13) | 8.27E-01 | 1.00 | (0.85-1.18) | 9.91E-01 | 0.97 | (0.82-1.15) | 7.25E-01 | 0.99 | (0.82-1.2) | 9.35E-01 |
| rs11766326 | 0.98 | (0.86-1.11) | 7.05E-01 | 0.94 | (0.8-1.1) | 4.39E-01 | 1.02 | (0.88-1.18) | 8.22E-01 | 0.98 | (0.86-1.13) | 8.12E-01 | 0.99 | (0.84-1.17) | 9.12E-01 | 0.97 | (0.82-1.15) | 7.57E-01 | 1.01 | (0.84-1.22) | 9.20E-01 |
| rs10233018 | 0.98 | (0.86-1.11) | 7.02E-01 | 0.94 | (0.8-1.1) | 4.23E-01 | 1.02 | (0.88-1.18) | 8.06E-01 | 0.99 | (0.86-1.13) | 8.68E-01 | 1.01 | (0.86-1.19) | 8.98E-01 | 0.96 | (0.81-1.13) | 6.11E-01 | 1.00 | (0.83-1.21) | 9.87E-01 |
| rs2952251 | 0.98 | (0.86-1.11) | 7.38E-01 | 0.94 | (0.8-1.1) | 4.13E-01 | 1.03 | (0.89-1.19) | 7.05E-01 | 1.00 | (0.87-1.14) | 9.48E-01 | 1.01 | (0.86-1.19) | 8.87E-01 | 0.98 | (0.83-1.16) | 7.89E-01 | 1.00 | (0.83-1.2) | 9.88E-01 |
| rs11783093 | 0.97 | (0.85-1.1) | 5.91E-01 | 0.92 | (0.79-1.08) | 3.15E-01 | 1.02 | (0.88-1.18) | 8.13E-01 | 0.98 | (0.85-1.12) | 7.27E-01 | 0.99 | (0.84-1.17) | 9.01E-01 | 0.96 | (0.81-1.14) | 6.36E-01 | 0.99 | (0.82-1.2) | 9.44E-01 |
| rs6993429 | 0.97 | (0.86-1.1) | 6.30E-01 | 0.94 | (0.8-1.1) | 4.11E-01 | 1.01 | (0.87-1.17) | 8.87E-01 | 0.98 | (0.85-1.12) | 7.52E-01 | 0.99 | (0.84-1.16) | 8.87E-01 | 0.97 | (0.82-1.14) | 6.98E-01 | 1.00 | (0.83-1.2) | 9.75E-01 |
| rs290601 | 0.97 | (0.86-1.1) | 6.40E-01 | 0.93 | (0.8-1.09) | 3.90E-01 | 1.01 | (0.87-1.17) | 8.62E-01 | 0.98 | (0.86-1.13) | 8.08E-01 | 1.00 | (0.85-1.18) | 9.79E-01 | 0.97 | (0.82-1.15) | 7.31E-01 | 1.00 | (0.83-1.21) | 9.91E-01 |
| rs3847244 | 0.97 | (0.86-1.1) | 6.35E-01 | 0.94 | (0.8-1.1) | 4.05E-01 | 1.01 | (0.87-1.17) | 8.83E-01 | 0.98 | (0.86-1.12) | 7.90E-01 | 0.99 | (0.84-1.16) | 8.86E-01 | 0.97 | (0.82-1.15) | 7.35E-01 | 0.99 | (0.82-1.2) | 9.25E-01 |
| rs7024924 | 0.97 | (0.86-1.1) | 6.44E-01 | 0.93 | (0.79-1.08) | 3.35E-01 | 1.02 | (0.88-1.19) | 7.67E-01 | 0.98 | (0.86-1.12) | 7.62E-01 | 0.99 | (0.84-1.17) | 9.34E-01 | 0.96 | (0.82-1.14) | 6.68E-01 | 0.99 | (0.82-1.2) | 9.53E-01 |
| rs1931431 | 0.98 | (0.86-1.11) | 7.40E-01 | 0.94 | (0.81-1.1) | 4.65E-01 | 1.02 | (0.88-1.18) | 8.06E-01 | 0.99 | (0.86-1.13) | 8.92E-01 | 1.01 | (0.85-1.19) | 9.46E-01 | 0.97 | (0.82-1.15) | 7.53E-01 | 1.01 | (0.83-1.21) | 9.44E-01 |
| rs10966092 | 0.97 | (0.86-1.1) | 6.87E-01 | 0.94 | (0.8-1.1) | 4.14E-01 | 1.02 | (0.88-1.18) | 7.98E-01 | 0.99 | (0.87-1.14) | 9.04E-01 | 1.01 | (0.86-1.19) | 9.20E-01 | 0.97 | (0.82-1.15) | 7.37E-01 | 0.99 | (0.82-1.19) | 8.96E-01 |
| rs4877285 | 0.97 | (0.86-1.1) | 6.07E-01 | 0.93 | (0.8-1.09) | 3.78E-01 | 1.01 | (0.87-1.17) | 8.91E-01 | 0.98 | (0.86-1.12) | 7.91E-01 | 0.99 | (0.84-1.17) | 9.01E-01 | 0.97 | (0.82-1.15) | 7.38E-01 | 0.99 | (0.82-1.19) | 9.07E-01 |
| rs34553878 | 0.97 | (0.86-1.1) | 6.72E-01 | 0.93 | (0.8-1.09) | 3.80E-01 | 1.02 | (0.88-1.18) | 7.86E-01 | 0.99 | (0.86-1.13) | 8.40E-01 | 1.00 | (0.85-1.18) | 9.98E-01 | 0.97 | (0.82-1.15) | 7.52E-01 | 0.99 | (0.82-1.2) | 9.55E-01 |
| rs10858334 | 0.98 | (0.86-1.11) | 7.23E-01 | 0.93 | (0.8-1.09) | 3.98E-01 | 1.03 | (0.89-1.19) | 7.22E-01 | 0.99 | (0.87-1.13) | 8.90E-01 | 1.00 | (0.85-1.18) | 9.98E-01 | 0.98 | (0.83-1.16) | 8.15E-01 | 1.01 | (0.84-1.22) | 9.28E-01 |
| rs7072776 | 0.96 | (0.85-1.09) | 5.51E-01 | 0.93 | (0.79-1.08) | 3.39E-01 | 1.01 | (0.87-1.16) | 9.42E-01 | 0.98 | (0.85-1.12) | 7.28E-01 | 0.99 | (0.84-1.17) | 9.21E-01 | 0.96 | (0.81-1.14) | 6.40E-01 | 0.98 | (0.81-1.18) | 8.23E-01 |
| rs2796793 | 0.98 | (0.86-1.11) | 7.01E-01 | 0.94 | (0.8-1.1) | 4.44E-01 | 1.02 | (0.88-1.18) | 8.21E-01 | 0.99 | (0.87-1.13) | 8.92E-01 | 1.00 | (0.85-1.18) | 9.91E-01 | 0.98 | (0.83-1.16) | 8.04E-01 | 0.99 | (0.82-1.2) | 9.56E-01 |
| rs7921378 | 0.98 | (0.86-1.11) | 7.20E-01 | 0.93 | (0.8-1.09) | 3.97E-01 | 1.03 | (0.89-1.19) | 7.22E-01 | 0.99 | (0.87-1.14) | 9.12E-01 | 1.01 | (0.85-1.19) | 9.42E-01 | 0.97 | (0.82-1.15) | 7.60E-01 | 1.00 | (0.83-1.21) | 9.61E-01 |
| rs11594623 | 0.97 | (0.86-1.1) | 6.74E-01 | 0.94 | (0.8-1.1) | 4.41E-01 | 1.01 | (0.87-1.18) | 8.65E-01 | 0.99 | (0.86-1.13) | 8.42E-01 | 1.00 | (0.85-1.19) | 9.65E-01 | 0.96 | (0.81-1.14) | 6.60E-01 | 1.00 | (0.83-1.21) | 9.90E-01 |
| rs12244388 | 0.97 | (0.86-1.1) | 6.33E-01 | 0.93 | (0.79-1.09) | 3.52E-01 | 1.02 | (0.88-1.18) | 8.10E-01 | 0.98 | (0.85-1.12) | 7.30E-01 | 0.99 | (0.84-1.17) | 9.13E-01 | 0.96 | (0.81-1.14) | 6.34E-01 | 1.01 | (0.84-1.22) | 9.33E-01 |
| rs10885480 | 0.97 | (0.86-1.1) | 6.43E-01 | 0.94 | (0.8-1.1) | 4.09E-01 | 1.01 | (0.87-1.17) | 8.84E-01 | 0.98 | (0.86-1.13) | 8.10E-01 | 0.99 | (0.84-1.17) | 9.32E-01 | 0.97 | (0.82-1.15) | 7.13E-01 | 0.99 | (0.82-1.19) | 8.78E-01 |
| rs4752018 | 0.98 | (0.87-1.11) | 7.64E-01 | 0.94 | (0.8-1.1) | 4.41E-01 | 1.03 | (0.89-1.19) | 7.07E-01 | 0.99 | (0.86-1.13) | 8.85E-01 | 1.01 | (0.86-1.19) | 9.24E-01 | 0.97 | (0.82-1.15) | 7.24E-01 | 1.00 | (0.83-1.21) | 9.83E-01 |
| rs62618693 | 0.98 | (0.86-1.11) | 7.33E-01 | 0.95 | (0.81-1.1) | 4.75E-01 | 1.02 | (0.88-1.18) | 8.19E-01 | 0.99 | (0.86-1.13) | 8.54E-01 | 1.00 | (0.85-1.18) | 9.98E-01 | 0.97 | (0.82-1.15) | 7.66E-01 | 1.01 | (0.84-1.21) | 9.30E-01 |
| rs61886926 | 0.99 | (0.87-1.11) | 8.18E-01 | 0.94 | (0.81-1.1) | 4.77E-01 | 1.03 | (0.89-1.19) | 6.59E-01 | 0.99 | (0.87-1.14) | 9.38E-01 | 1.01 | (0.85-1.19) | 9.47E-01 | 0.98 | (0.83-1.16) | 8.42E-01 | 1.02 | (0.85-1.22) | 8.34E-01 |
| rs7943721 | 0.97 | (0.86-1.1) | 6.24E-01 | 0.93 | (0.79-1.09) | 3.68E-01 | 1.02 | (0.88-1.18) | 8.44E-01 | 0.98 | (0.86-1.12) | 7.74E-01 | 0.99 | (0.84-1.16) | 8.88E-01 | 0.97 | (0.82-1.15) | 7.08E-01 | 1.00 | (0.83-1.2) | 9.80E-01 |
| rs2155646 | 0.98 | (0.86-1.11) | 7.12E-01 | 0.92 | (0.79-1.08) | 3.09E-01 | 1.04 | (0.89-1.21) | 6.19E-01 | 0.99 | (0.87-1.14) | 9.25E-01 | 1.02 | (0.86-1.2) | 8.43E-01 | 0.98 | (0.82-1.16) | 7.85E-01 | 1.00 | (0.83-1.21) | 9.93E-01 |
| rs540860 | 0.99 | (0.87-1.11) | 8.23E-01 | 0.95 | (0.81-1.11) | 5.06E-01 | 1.03 | (0.89-1.19) | 6.95E-01 | 1.00 | (0.87-1.14) | 9.87E-01 | 1.01 | (0.86-1.19) | 9.22E-01 | 0.99 | (0.84-1.17) | 9.01E-01 | 1.00 | (0.83-1.21) | 9.83E-01 |
| rs1106363 | 0.98 | (0.87-1.11) | 7.82E-01 | 0.95 | (0.81-1.11) | 5.01E-01 | 1.02 | (0.88-1.19) | 7.66E-01 | 0.99 | (0.87-1.14) | 9.12E-01 | 1.01 | (0.86-1.19) | 8.70E-01 | 0.97 | (0.82-1.15) | 7.29E-01 | 1.01 | (0.84-1.22) | 8.84E-01 |
| rs13906 | 0.97 | (0.86-1.1) | 6.57E-01 | 0.94 | (0.8-1.1) | 4.21E-01 | 1.01 | (0.87-1.17) | 8.74E-01 | 0.98 | (0.86-1.13) | 8.14E-01 | 1.00 | (0.85-1.18) | 9.79E-01 | 0.97 | (0.82-1.14) | 6.90E-01 | 1.00 | (0.83-1.2) | 9.68E-01 |
| rs7969559 | 0.98 | (0.87-1.11) | 7.58E-01 | 0.94 | (0.8-1.1) | 4.38E-01 | 1.03 | (0.89-1.19) | 7.10E-01 | 0.99 | (0.87-1.14) | 9.34E-01 | 1.01 | (0.86-1.19) | 8.83E-01 | 0.97 | (0.82-1.15) | 7.61E-01 | 1.00 | (0.83-1.21) | 9.88E-01 |
| rs77215829 | 0.99 | (0.88-1.12) | 8.66E-01 | 0.95 | (0.81-1.11) | 5.12E-01 | 1.04 | (0.9-1.2) | 6.34E-01 | 1.00 | (0.88-1.14) | 9.51E-01 | 1.02 | (0.87-1.19) | 8.27E-01 | 0.99 | (0.84-1.16) | 8.98E-01 | 1.02 | (0.85-1.22) | 8.60E-01 |
| rs1109480 | 0.98 | (0.86-1.11) | 7.10E-01 | 0.93 | (0.8-1.09) | 3.86E-01 | 1.03 | (0.89-1.19) | 7.16E-01 | 0.99 | (0.86-1.13) | 8.61E-01 | 1.00 | (0.84-1.17) | 9.57E-01 | 0.98 | (0.82-1.15) | 7.70E-01 | 1.01 | (0.84-1.22) | 9.17E-01 |
| rs56367474 | 0.97 | (0.86-1.1) | 6.27E-01 | 0.93 | (0.79-1.08) | 3.45E-01 | 1.02 | (0.88-1.18) | 8.07E-01 | 0.98 | (0.86-1.13) | 8.26E-01 | 1.01 | (0.85-1.19) | 9.47E-01 | 0.96 | (0.81-1.14) | 6.63E-01 | 1.00 | (0.83-1.2) | 9.60E-01 |
| rs55786907 | 0.97 | (0.86-1.1) | 6.67E-01 | 0.93 | (0.8-1.09) | 3.96E-01 | 1.02 | (0.88-1.18) | 8.32E-01 | 0.99 | (0.86-1.13) | 8.80E-01 | 1.00 | (0.85-1.18) | 9.99E-01 | 0.98 | (0.83-1.16) | 7.82E-01 | 1.00 | (0.83-1.21) | 9.98E-01 |
| rs9545155 | 0.97 | (0.86-1.1) | 6.28E-01 | 0.94 | (0.8-1.09) | 4.04E-01 | 1.01 | (0.87-1.17) | 8.86E-01 | 0.98 | (0.86-1.12) | 7.75E-01 | 0.99 | (0.84-1.17) | 9.34E-01 | 0.97 | (0.82-1.15) | 7.04E-01 | 0.99 | (0.82-1.19) | 9.16E-01 |
| rs7333559 | 0.98 | (0.86-1.11) | 7.35E-01 | 0.93 | (0.8-1.09) | 3.95E-01 | 1.03 | (0.89-1.19) | 7.09E-01 | 0.99 | (0.86-1.13) | 8.36E-01 | 0.99 | (0.84-1.17) | 9.34E-01 | 0.98 | (0.83-1.16) | 7.89E-01 | 1.01 | (0.84-1.22) | 8.88E-01 |
| rs1108130 | 0.97 | (0.86-1.1) | 6.12E-01 | 0.93 | (0.79-1.09) | 3.60E-01 | 1.01 | (0.87-1.18) | 8.53E-01 | 0.98 | (0.86-1.12) | 7.69E-01 | 0.99 | (0.84-1.17) | 8.93E-01 | 0.97 | (0.82-1.15) | 7.04E-01 | 0.99 | (0.82-1.2) | 9.43E-01 |
| rs12878369 | 0.97 | (0.86-1.1) | 6.66E-01 | 0.94 | (0.8-1.1) | 4.35E-01 | 1.01 | (0.87-1.17) | 8.73E-01 | 0.99 | (0.86-1.13) | 8.36E-01 | 1.00 | (0.85-1.18) | 9.97E-01 | 0.97 | (0.82-1.15) | 7.39E-01 | 1.01 | (0.84-1.22) | 8.96E-01 |
| rs1811739 | 0.97 | (0.86-1.1) | 6.30E-01 | 0.93 | (0.79-1.09) | 3.57E-01 | 1.01 | (0.87-1.17) | 8.82E-01 | 0.98 | (0.86-1.12) | 7.86E-01 | 0.99 | (0.84-1.17) | 9.07E-01 | 0.97 | (0.82-1.15) | 7.35E-01 | 0.99 | (0.82-1.19) | 9.04E-01 |
| rs8005334 | 0.98 | (0.86-1.11) | 7.06E-01 | 0.93 | (0.8-1.09) | 3.94E-01 | 1.02 | (0.88-1.19) | 7.47E-01 | 0.99 | (0.86-1.13) | 8.59E-01 | 0.99 | (0.84-1.17) | 9.40E-01 | 0.98 | (0.83-1.16) | 7.88E-01 | 1.00 | (0.83-1.21) | 9.87E-01 |
| rs1381287 | 0.97 | (0.86-1.1) | 6.64E-01 | 0.94 | (0.8-1.1) | 4.18E-01 | 1.01 | (0.87-1.18) | 8.54E-01 | 0.98 | (0.86-1.12) | 7.94E-01 | 1.00 | (0.84-1.18) | 9.63E-01 | 0.97 | (0.82-1.14) | 6.96E-01 | 1.00 | (0.82-1.2) | 9.59E-01 |
| rs1435672 | 0.97 | (0.86-1.1) | 6.25E-01 | 0.93 | (0.79-1.09) | 3.60E-01 | 1.02 | (0.88-1.18) | 8.41E-01 | 0.98 | (0.86-1.13) | 8.07E-01 | 1.00 | (0.85-1.18) | 9.97E-01 | 0.96 | (0.82-1.14) | 6.63E-01 | 0.99 | (0.82-1.2) | 9.41E-01 |
| rs281296 | 0.97 | (0.85-1.1) | 6.07E-01 | 0.93 | (0.79-1.08) | 3.33E-01 | 1.02 | (0.87-1.18) | 8.40E-01 | 0.98 | (0.86-1.13) | 8.06E-01 | 0.99 | (0.84-1.17) | 9.47E-01 | 0.97 | (0.82-1.15) | 7.08E-01 | 0.98 | (0.82-1.19) | 8.60E-01 |
| rs62007780 | 0.98 | (0.86-1.11) | 7.38E-01 | 0.94 | (0.81-1.1) | 4.67E-01 | 1.02 | (0.88-1.18) | 8.00E-01 | 0.99 | (0.87-1.14) | 9.27E-01 | 1.01 | (0.85-1.19) | 9.38E-01 | 0.98 | (0.83-1.16) | 8.13E-01 | 1.00 | (0.83-1.21) | 9.62E-01 |
| rs4310804 | 0.97 | (0.86-1.1) | 6.49E-01 | 0.93 | (0.79-1.09) | 3.52E-01 | 1.02 | (0.88-1.18) | 7.80E-01 | 0.99 | (0.86-1.13) | 8.35E-01 | 1.00 | (0.85-1.18) | 9.74E-01 | 0.97 | (0.82-1.15) | 7.42E-01 | 1.00 | (0.83-1.2) | 9.69E-01 |
| rs1139897 | 0.97 | (0.86-1.1) | 6.35E-01 | 0.93 | (0.8-1.09) | 3.93E-01 | 1.01 | (0.87-1.17) | 8.68E-01 | 0.98 | (0.86-1.13) | 8.06E-01 | 1.00 | (0.85-1.18) | 9.97E-01 | 0.96 | (0.81-1.14) | 6.65E-01 | 1.00 | (0.82-1.2) | 9.62E-01 |
| rs7188873 | 0.97 | (0.85-1.09) | 5.76E-01 | 0.92 | (0.79-1.08) | 3.11E-01 | 1.01 | (0.87-1.18) | 8.44E-01 | 0.98 | (0.85-1.12) | 7.17E-01 | 0.99 | (0.84-1.17) | 9.22E-01 | 0.96 | (0.81-1.13) | 6.28E-01 | 1.00 | (0.83-1.21) | 9.76E-01 |
| rs4785187 | 0.98 | (0.86-1.11) | 6.96E-01 | 0.94 | (0.8-1.1) | 4.13E-01 | 1.02 | (0.88-1.18) | 7.99E-01 | 0.99 | (0.86-1.13) | 8.38E-01 | 1.00 | (0.85-1.18) | 9.97E-01 | 0.97 | (0.82-1.15) | 7.12E-01 | 1.00 | (0.83-1.2) | 9.82E-01 |
| rs8050598 | 0.98 | (0.87-1.11) | 7.51E-01 | 0.94 | (0.8-1.1) | 4.25E-01 | 1.03 | (0.89-1.19) | 7.05E-01 | 0.99 | (0.87-1.14) | 9.18E-01 | 1.01 | (0.86-1.19) | 9.24E-01 | 0.98 | (0.83-1.16) | 7.79E-01 | 1.01 | (0.84-1.22) | 9.23E-01 |
| rs9302604 | 0.97 | (0.85-1.09) | 5.79E-01 | 0.93 | (0.79-1.08) | 3.39E-01 | 1.01 | (0.87-1.17) | 8.73E-01 | 0.98 | (0.86-1.12) | 7.68E-01 | 1.00 | (0.84-1.17) | 9.54E-01 | 0.96 | (0.81-1.13) | 6.28E-01 | 1.00 | (0.83-1.2) | 9.84E-01 |
| rs4790874 | 0.97 | (0.86-1.1) | 6.15E-01 | 0.93 | (0.8-1.09) | 3.78E-01 | 1.01 | (0.87-1.17) | 8.85E-01 | 0.98 | (0.85-1.12) | 7.39E-01 | 0.99 | (0.84-1.17) | 9.12E-01 | 0.96 | (0.81-1.13) | 6.32E-01 | 1.00 | (0.83-1.21) | 9.78E-01 |
| rs28441558 | 0.97 | (0.86-1.1) | 6.22E-01 | 0.93 | (0.8-1.09) | 3.91E-01 | 1.01 | (0.87-1.17) | 8.82E-01 | 0.98 | (0.86-1.12) | 7.41E-01 | 0.99 | (0.84-1.17) | 9.25E-01 | 0.96 | (0.81-1.14) | 6.61E-01 | 1.00 | (0.83-1.2) | 9.85E-01 |
| rs67777803 | 0.97 | (0.86-1.1) | 6.77E-01 | 0.94 | (0.8-1.1) | 4.20E-01 | 1.02 | (0.88-1.18) | 8.36E-01 | 0.99 | (0.86-1.13) | 8.83E-01 | 1.00 | (0.85-1.18) | 9.92E-01 | 0.98 | (0.83-1.16) | 8.09E-01 | 0.99 | (0.82-1.2) | 9.35E-01 |
| rs3764351 | 0.97 | (0.85-1.09) | 5.69E-01 | 0.92 | (0.79-1.08) | 3.15E-01 | 1.01 | (0.87-1.17) | 8.81E-01 | 0.98 | (0.86-1.12) | 7.78E-01 | 0.99 | (0.84-1.17) | 9.24E-01 | 0.97 | (0.82-1.14) | 6.84E-01 | 0.98 | (0.82-1.18) | 8.52E-01 |
| rs75919030 | 0.97 | (0.86-1.1) | 6.17E-01 | 0.93 | (0.8-1.09) | 3.91E-01 | 1.01 | (0.87-1.17) | 8.81E-01 | 0.98 | (0.86-1.12) | 7.69E-01 | 1.00 | (0.84-1.18) | 9.72E-01 | 0.96 | (0.81-1.14) | 6.34E-01 | 1.00 | (0.83-1.21) | 9.87E-01 |
| rs67050670 | 0.98 | (0.86-1.11) | 7.14E-01 | 0.94 | (0.8-1.1) | 4.09E-01 | 1.02 | (0.88-1.19) | 7.60E-01 | 0.99 | (0.87-1.14) | 9.01E-01 | 1.00 | (0.85-1.18) | 9.80E-01 | 0.98 | (0.83-1.16) | 8.39E-01 | 1.00 | (0.83-1.21) | 9.76E-01 |
| rs1373178 | 0.97 | (0.86-1.1) | 6.87E-01 | 0.93 | (0.79-1.09) | 3.56E-01 | 1.03 | (0.89-1.19) | 7.26E-01 | 0.99 | (0.86-1.13) | 8.46E-01 | 1.00 | (0.84-1.18) | 9.61E-01 | 0.97 | (0.82-1.15) | 7.63E-01 | 1.00 | (0.83-1.21) | 9.70E-01 |
| rs72938304 | 0.96 | (0.85-1.09) | 5.69E-01 | 0.92 | (0.79-1.08) | 3.07E-01 | 1.01 | (0.87-1.18) | 8.57E-01 | 0.98 | (0.86-1.12) | 7.53E-01 | 0.99 | (0.84-1.17) | 8.99E-01 | 0.97 | (0.82-1.14) | 6.88E-01 | 0.99 | (0.82-1.19) | 8.92E-01 |
| rs71367544 | 0.97 | (0.85-1.09) | 5.95E-01 | 0.92 | (0.79-1.08) | 3.15E-01 | 1.02 | (0.88-1.18) | 8.17E-01 | 0.98 | (0.86-1.12) | 7.90E-01 | 1.00 | (0.84-1.18) | 9.68E-01 | 0.97 | (0.82-1.14) | 6.85E-01 | 0.98 | (0.82-1.18) | 8.55E-01 |
| rs113230003 | 0.97 | (0.86-1.1) | 6.66E-01 | 0.93 | (0.79-1.08) | 3.35E-01 | 1.03 | (0.88-1.19) | 7.39E-01 | 0.99 | (0.86-1.13) | 8.50E-01 | 1.01 | (0.86-1.19) | 8.98E-01 | 0.96 | (0.82-1.14) | 6.73E-01 | 1.00 | (0.83-1.2) | 9.83E-01 |
| rs8103660 | 0.98 | (0.87-1.11) | 7.62E-01 | 0.95 | (0.81-1.11) | 4.95E-01 | 1.02 | (0.88-1.18) | 7.96E-01 | 0.99 | (0.87-1.14) | 9.30E-01 | 1.00 | (0.85-1.18) | 9.92E-01 | 0.99 | (0.84-1.16) | 8.61E-01 | 1.01 | (0.83-1.21) | 9.48E-01 |
| rs6050446 | 0.97 | (0.86-1.1) | 6.75E-01 | 0.93 | (0.8-1.09) | 3.95E-01 | 1.02 | (0.88-1.18) | 7.90E-01 | 0.98 | (0.86-1.13) | 8.20E-01 | 1.00 | (0.85-1.18) | 9.64E-01 | 0.96 | (0.82-1.14) | 6.77E-01 | 1.00 | (0.83-1.21) | 9.73E-01 |
| rs6073075 | 0.97 | (0.86-1.1) | 6.85E-01 | 0.93 | (0.8-1.09) | 3.98E-01 | 1.02 | (0.88-1.18) | 7.91E-01 | 0.99 | (0.86-1.13) | 8.65E-01 | 1.00 | (0.85-1.18) | 9.60E-01 | 0.97 | (0.82-1.15) | 7.28E-01 | 0.99 | (0.82-1.2) | 9.55E-01 |
| rs910912 | 0.98 | (0.87-1.11) | 7.55E-01 | 0.94 | (0.81-1.1) | 4.54E-01 | 1.03 | (0.89-1.19) | 7.22E-01 | 0.99 | (0.87-1.14) | 9.30E-01 | 1.00 | (0.85-1.18) | 9.68E-01 | 0.98 | (0.83-1.16) | 8.08E-01 | 1.00 | (0.83-1.21) | 9.76E-01 |
| rs4818005 | 0.98 | (0.86-1.11) | 6.99E-01 | 0.93 | (0.79-1.09) | 3.70E-01 | 1.03 | (0.89-1.19) | 7.14E-01 | 0.99 | (0.86-1.13) | 8.45E-01 | 1.00 | (0.84-1.17) | 9.55E-01 | 0.97 | (0.82-1.15) | 7.37E-01 | 1.00 | (0.83-1.21) | 9.76E-01 |
| rs4822102 | 0.98 | (0.86-1.11) | 7.21E-01 | 0.94 | (0.8-1.1) | 4.49E-01 | 1.02 | (0.88-1.18) | 8.08E-01 | 0.99 | (0.86-1.13) | 8.54E-01 | 1.00 | (0.84-1.18) | 9.63E-01 | 0.98 | (0.83-1.16) | 7.91E-01 | 1.01 | (0.84-1.22) | 9.21E-01 |
| rs9627272 | 0.97 | (0.85-1.09) | 5.90E-01 | 0.93 | (0.79-1.09) | 3.65E-01 | 1.01 | (0.87-1.17) | 8.98E-01 | 0.98 | (0.86-1.12) | 7.34E-01 | 0.98 | (0.84-1.15) | 8.12E-01 | 0.97 | (0.82-1.15) | 7.28E-01 | 1.00 | (0.83-1.2) | 9.84E-01 |

OR: odds ratio; CI: confidence intervals; IVW: Inverse-variance weighted
