# Supplementary material for: Causal Effects of Lifetime Smoking on Breast and Colorectal Cancer Risk: Mendelian Randomization Study
Source: Oxford University Press journal article supplement (doi:10.1158/1055-9965.epi-20-1218), 2021-03-02
Supplement: 10559965epi201218-sup-249540_3_supp_6914602_qcdkyh.doc [file 10559965epi201218-sup-249540_3_supp_6914602_qcdkyh.doc]

| Supplementary Table 7. Multivariable Mendelian randomization estimates for the causal effect of lifetime amount of smoking on cancer risk accounting for educational attainment and age at menarche. | | | | |
| --- | --- | --- | --- | --- |
| Methods | OR | 95% CI | P-value | P-value for pleiotropy or heterogeneity |
| Breast cancer | | | | |
| Multivariable IVW (educational attaintment) | 1.18 | (1.00-1.38) | 0.05 | < 0.01 |
| Multivariable IVW (age at menarche) | 1.12 | (0.99-1.26) | 0.06 | < 0.01 |
| Breast cancer ER+ subset | | | | |
| Multivariable IVW (educational attaintment) | 1.17 | (0.98-1.40) | 0.09 | < 0.01 |
| Multivariable IVW (age at menarche) | 1.11 | (0.97-1.26) | 0.13 | < 0.01 |
| Breast cancer ER- subset | | | | |
| Multivariable IVW (educational attaintment) | 1.08 | (0.86-1.36) | 0.50 | < 0.01 |
| Multivariable IVW (age at menarche) | 1.13 | (0.94-1.36) | 0.18 | < 0.01 |
| Colorectal cancer | | | | |
| Multivariable IVW (educational attaintment) | 1.11 | (0.93-1.32) | 0.24 | 0.04 |
| Colorectal cancer (women) | | | | |
| Multivariable IVW (educational attaintment) | 1.01 | (0.79-1.29) | 0.93 | 0.04 |
| Colorectal cancer (men) | | | | |
| Multivariable IVW (educational attaintment) | 1.22 | (0.97-1.52) | 0.08 | 0.57 |
| Colon Cancer | | | | |
| Multivariable IVW (educational attaintment) | 1.22 | (0.99-1.49) | 0.06 | 0.12 |
| Distal colon cancer | | | | |
| Multivariable IVW (educational attaintment) | 1.45 | (1.10-1.91) | 0.01 | 0.02 |
| Proximal colon cancer | | | | |
| Multivariable IVW (educational attaintment) | 1.04 | (0.82-1.33) | 0.75 | 0.39 |
| Rectal cancer | | | | |
| Multivariable IVW (educational attaintment) | 1.15 | (0.86-1.52) | 0.35 | < 0.01 |
| OR: odds ratio; CI: confidence intervals; IVW: Inverse-variance weighted | | | | |
