# Supplementary material for: Causal Effects of Lifetime Smoking on Breast and Colorectal Cancer Risk: Mendelian Randomization Study
Source: Oxford University Press journal article supplement (doi:10.1158/1055-9965.epi-20-1218), 2021-03-02
Supplement: 10559965epi201218-sup-249540_3_supp_6914610_qfdkyh.doc [file 10559965epi201218-sup-249540_3_supp_6914610_qfdkyh.doc]

| Supplementary Table 8. Multivariable Mendelian randomization estimates for the causal effect of ever having smoked regularly on cancer risk accounting for educational attainment and age at menarche. | | | | |
| --- | --- | --- | --- | --- |
| Methods | OR | 95% CI | P-value | P-value for heterogeneity |
| Breast cancer | | | | |
| Multivariable IVW (educational attaintment) | 0.99 | (0.87-1.14) | 0.93 | < 0.01 |
| Multivariable IVW (age at menarche) | 1.01 | (0.90-1.14) | 0.84 | < 0.01 |
| Breast cancer ER+ subset | | | | |
| Multivariable IVW (educational attaintment) | 1.00 | (0.86-1.15) | 0.96 | < 0.01 |
| Multivariable IVW (age at menarche) | 1.01 | (0.89-1.16) | 0.83 | < 0.01 |
| Breast cancer ER- subset | | | | |
| Multivariable IVW (educational attaintment) | 0.93 | (0.78-1.11) | 0.44 | < 0.01 |
| Multivariable IVW (age at menarche) | 1.03 | (0.87-1.22) | 0.75 | < 0.01 |
| Colorectal cancer | | | | |
| Multivariable IVW (educational attaintment) | 0.88 | (0.76-1.02) | 0.10 | < 0.01 |
| Colorectal cancer (women) | | | | |
| Multivariable IVW (educational attaintment) | 0.86 | (0.72-1.02) | 0.08 | < 0.01 |
| Colorectal cancer (men) | | | | |
| Multivariable IVW (educational attaintment) | 0.90 | (0.76-1.07) | 0.24 | < 0.01 |
| Colon cancer | | | | |
| Multivariable IVW (educational attaintment) | 0.90 | (0.77-1.06) | 0.20 | < 0.01 |
| Distal colon cancer | | | | |
| Multivariable IVW (educational attaintment) | 0.88 | (0.73-1.07) | 0.19 | < 0.01 |
| Proximal colon cancer | | | | |
| Multivariable IVW (educational attaintment) | 0.90 | (0.75-1.10) | 0.31 | < 0.01 |
| Rectal cancer | | | | |
| Multivariable IVW (educational attaintment) | 0.81 | (0.66-1.00) | 0.05 | < 0.01 |
| OR: odds ratio; CI: confidence intervals; IVW: Inverse-variance weighted | | | | |
